# Supplementary material for: Prevalence and Source Tracing of PFAS in Shallow Groundwater Used for Drinking Water in Wisconsin, USA
Source: PubMed Central journal article supplement (PMC10653221; doi:10.1021/acs.est.3c02826), 2023-11-02
Supplement: es3c02826_si_001.pdf [file es3c02826_si_001.pdf]

Supporting Information for

## **Prevalence and source tracing of PFAS in shallow groundwater used for drinking water in Wisconsin, USA**

Matthew Silver<sup>1</sup>, William Phelps<sup>1</sup>, Kevin Masarik<sup>2</sup>, Kyle Burke<sup>3</sup>, Chen Zhang<sup>3</sup>, Alex Schwartz<sup>3</sup>, Miaoyan Wang<sup>4</sup>, Amy L. Nitka<sup>2</sup>, Jordan Schutz<sup>1</sup>, Tom Trainor<sup>5</sup>, John W. Washington<sup>6</sup>, Bruce D. Rheineck<sup>1</sup>

<sup>1</sup>Bureau of Drinking Water and Groundwater—Groundwater Section, Wisconsin Department of Natural Resources, Madison, Wisconsin 53707, United States

<sup>2</sup>Center for Watershed Science and Education, College of Natural Resources, University of Wisconsin—Stevens Point, Stevens Point, Wisconsin 54481, United States

<sup>3</sup>Environmental Health Division - Organics, Wisconsin State Laboratory of Hygiene, Madison, Wisconsin 53707, United States

<sup>4</sup>Department of Statistics, University of Wisconsin—Madison, Madison, Wisconsin 53707, United States

<sup>5</sup>Bureau of Environmental Analysis and Sustainability – Laboratory Certification, Wisconsin Department of Natural Resources, Green Bay, Wisconsin 54313, United States

<sup>6</sup>Center for Environmental Measurement and Modeling, U.S. Environmental Protection Agency, Athens, Georgia 30605, United States

The Supporting Information contains:

- 46 pages
- 24 tables (Tables S20-S24 in a separate XLSX file)
- 10 figures

## Contents

|                                                                                   |     |
|-----------------------------------------------------------------------------------|-----|
| <b>1.0 Additional description of materials and methods</b> .....                  | S4  |
| 1.1 Sampling grid and sample point selection .....                                | S4  |
| 1.2 Sampling procedure .....                                                      | S4  |
| 1.3 PFAS laboratory analysis .....                                                | S7  |
| 1.3.1 Analytes and standards.....                                                 | S7  |
| 1.3.2 PFAS extraction .....                                                       | S14 |
| 1.3.3 PFAS Analysis by HPLC-MS/MS .....                                           | S15 |
| 1.3.4 PFAS Quality control and quantitation .....                                 | S16 |
| 1.4 Laboratory analysis of human waste indicators and herbicide metabolites ..... | S25 |
| 1.4.1 Purchased chemicals.....                                                    | S27 |
| 1.4.2 Aqueous extraction method for human waste indicators .....                  | S28 |
| 1.4.3 Aqueous extraction method for chloroacetanilide metabolites .....           | S28 |
| 1.4.4 LC/MS/MS method for human waste indicators .....                            | S28 |
| 1.4.5 LC/MS/MS method for chloroacetanilide metabolites.....                      | S29 |
| 1.4.6 Quality control – non-PFAS organics .....                                   | S29 |
| 1.5 Inorganics and total organic carbon .....                                     | S30 |
| 1.6 Land use data analysis.....                                                   | S34 |
| <b>2.0 Results and discussion</b> .....                                           | S35 |
| 2.1 Occurrence .....                                                              | S35 |
| 2.2 Source tracing .....                                                          | S39 |
| <b>References</b> .....                                                           | S46 |

## Figures

|                                                                                                                                                                            |     |
|----------------------------------------------------------------------------------------------------------------------------------------------------------------------------|-----|
| Figure S1. Structures from EPA CompTox7 of the human waste indicator (HWI) and chloroacetanilide metabolite (CAAM) analytes.....                                           | S26 |
| Figure S2. Boxplots of detected and modeled PFAS concentrations at or above 0.181 ng/L .....                                                                               | S36 |
| Figure S3. Regression on order statistics models for the three compounds with modeled concentrations above 0.181 ng/L .....                                                | S37 |
| Figure S4. Prevalence of non-PFAS analytes/parameters in the 450 samples .....                                                                                             | S38 |
| Figure S5. Field measurement values of water pH, temperature (°C) and conductivity (µS/cm) in the 450 samples .....                                                        | S39 |
| Figure S6. Project samples with all detected PFAS below 2020 Wisconsin precipitation levels .....                                                                          | S39 |
| Figure S7. Rate of detection of individual PFAS, at any concentration, across land use categories .....                                                                    | S41 |
| Figure S8. Correlation plot with intensity and amount of color indicating the value of the Spearman correlation coefficient ( $\rho$ ) between two variables .....         | S43 |
| Figure S9. A) Concentrations of PFBA at the 450 project sites and B) comparison of concentrations in the Western Area (shaded yellow on A) vs. the rest of the state ..... | S44 |
| Figure S10. Stacked column plots of the PFAS detected in 18 of the 19 samples with one or more PFAS above the EPA March 2023 proposed MCLs.....                            | S45 |

## 1.0 Additional description of materials and methods

### 1.1 Sampling grid and sample point selection

The range in grid cell areas (Figure 1 of the manuscript) is 316 to 326 km<sup>2</sup> (122-126 square miles).

Step 3 of sampling location selection consisted of several sub-steps and iterations. Initially, five WCRs were selected at random off of each list from Step 2. Invitation letters, offering the opportunity to participate in the study, were sent to, typically, three addresses from the five selected (based on determination of a useable mailing address). If more than one positive response to the mailed invitation was received for a grid cell, the participant selected for sampling was chosen randomly. If only one positive response was received, that location was selected for sampling. If no positive responses were received for a grid cell, letters were sent to additional randomly selected participants in the same grid cell (from the list produced in Step 2), in three additional mailing rounds until a positive response was received. Grid cells for the study and sampling locations are shown in Figure 1 of the manuscript. For nine out of the 450 grid cells, a second sampling location in a nearby grid cell was used, as no invited participant in the original (blue-shaded) grid cell accepted the study participation invitation.

### 1.2 Sampling procedure

Sampling was performed in teams of two trained samplers. Sampling kits were prepared before leaving for the field. After collection, samples were stored in battery/electrical-powered coolers capable of achieving cooling down to -20 °C, with the option for also setting cooling temperatures within the range 0°C to 6°C. An overview of sample bottles, field QC samples, preservation and holding times is provided in Table S1.

Due to potential for sample contamination, in particular for PFAS, the following precautions were taken:

1. Samplers typically wore cotton clothing that had been washed at least three times prior to sampling.
2. No personal care products were applied after leaving the vehicle to begin sampling.
3. Personal care products such as sunscreen and mosquito repellent were chosen in consideration of product information in PFAS Sampling Guidance from the Michigan Department of Environmental Quality<sup>1</sup>. These products were only applied in the morning and during breaks.
4. No consumption of food or drink during sampling, with the exception of bottled water.
5. Hands were washed thoroughly before filling sample bottles and care was taken to touch only parts of the bottles and caps that do not come in contact with sample water.

After arriving at a site, contact was made with the homeowner/resident if present and an information packet was left for them. Both samplers worked on measurement of field parameters. When it was time to fill sample bottles, sampling was performed following the “clean hands/dirty hands” technique. One member of the sampling team was designated prior to arrival at the site as "dirty hands" while the second member was designated as "clean hands". All operations involving contact with the sample bottle were handled by the individual designated as "clean hands", while the sampler designated as “dirty hands” performed other tasks (e.g., labeling, note taking, and turning the faucet on before sampling).

Steps performed were as follows:

1. Identification of the tap to be sampled. Typically, an outdoor tap was sampled. In some cases, an indoor tap near the pressure tank, before any installed treatment system, was sampled.
2. Run water, purging about 10 gallons through a hose directed to an area away from the home or other buildings.
3. Begin measuring field parameters using a flow-thru cell or, if not available, with probes at the bottom of a 5-gallon bucket.
4. Continue until stabilization of water temperature, specific conductance and pH, then those parameters plus dissolved oxygen were recorded.
5. Sampler 1 (designated to keep clean hands) opened the PFAS sampling kit (LDPE bag with a loosely tied knot) and put on the powderless nitrile gloves.
6. Both PFAS sample bottles were filled so that they were about 90% full, allowing room for expansion when the sample freezes, then the field blank was collected by pouring lab-supplied blank water in one 250 mL PP bottle into another.
7. Remaining sample bottles were filled in this order: 1000 mL amber glass bottle (human waste and herbicide indicators), 250 mL amber glass pre-filled with sulfuric acid (NO<sub>x</sub>, TAN and chloride), 250 mL HDPE (metallic and other elements), 60 mL HDPE (conductivity, pH, alkalinity).
8. The second sampler began labeling sample bottles with a fine-tip permanent marker after all sample bottles for PFAS, including the field blank, had been filled and capped.
9. Sample bottles were placed in cold storage following Table S1.

**Table S1. Sample bottles, field QC samples, preservation and holding times**

| Analytical group                                                           | Primary sample                                                                             | Field Reagent Blanks   | Field Duplicates                                   | Matrix spike (MS) Matrix spike duplicate (MSD)                                                                                                                                     | Preservation                                                                             | Holding time          |
|----------------------------------------------------------------------------|--------------------------------------------------------------------------------------------|------------------------|----------------------------------------------------|------------------------------------------------------------------------------------------------------------------------------------------------------------------------------------|------------------------------------------------------------------------------------------|-----------------------|
| PFAS                                                                       | 250 mL PP bottle, as labeled in Appendix B                                                 | 1 per sample           | 1 collected for every sample, 1 per batch analyzed | None since method uses isotope dilution                                                                                                                                            | Frozen at -20°C to <0°C                                                                  | 90 days to extraction |
| CAAMs and PPCPs                                                            | 1000 mL amber glass bottle                                                                 | 1 for every 20 samples | 1 for every 20 samples                             | 1 MS/MSD for every 20 samples; 1000 mL is sufficient to do MS/MSD.                                                                                                                 | Refrigeration at 0°C to 6°C (not frozen)                                                 | 28 days to extraction |
| Inorganics<br>Bottle 1:<br>metallic and other elements by ICP-OES          | 60 mL HDPE bottle, unpreserved until arrival in laboratory (HNO <sub>3</sub> added in lab) | 6 total                | 6 total                                            | Independent from field QC samples, one MS every 10 field samples, MSD as needed to assess instrument reproducibility; 60 mL sample volume is sufficient for MS/MSD and the sample. | 0°C to 6°C (not frozen)                                                                  | 28 days               |
| Inorganics<br>Bottle 2: NO <sub>x</sub> , TAN and chloride by FIA, and TOC | 250 mL amber glass bottle, containing H <sub>2</sub> SO <sub>4</sub> as preservative       | 6 total                | 6 total                                            | Independent from field QC samples, one MS every 20 field samples for all; one MSD included for TAN every 20 samples.                                                               | 0°C to 6°C (not frozen), H <sub>2</sub> SO <sub>4</sub> added to bottles before sampling | 28 days               |

| Analytical group                                       | Primary sample                     | Field Reagent Blanks | Field Duplicates | Matrix spike (MS) Matrix spike duplicate (MSD) | Preservation                                                                  | Holding time |
|--------------------------------------------------------|------------------------------------|----------------------|------------------|------------------------------------------------|-------------------------------------------------------------------------------|--------------|
| Inorganics<br>Bottle 3:<br>alkalinity and conductivity | 250 mL HDPE bottle,<br>unpreserved | 6 total              | 6 total          | None                                           | 0°C to 6°C (not frozen)<br>(HNO <sub>3</sub> added in the lab after sampling) | 14 days      |

Notes:

1. PPCPs = Pharmaceuticals, personal care products, artificial sweeteners
2. CAAMs = Chloroacetanilide herbicide metabolites
3. HDPE = high density polyethylene; PP = polypropylene
4. NO<sub>x</sub> = nitrate plus nitrite nitrogen; TAN = total ammonia/ammonium nitrogen, TOC = total organic carbon (non-purgeable)

### 1.3 PFAS laboratory analysis

PFAS laboratory analysis was performed at the Wisconsin State Laboratory of Hygiene.

#### 1.3.1 Analytes and standards

Analytes and standards are listed in Table S2. Methanol (HPLC grade), and ammonium acetate (MS grade) were purchased from Honeywell and Sigma Aldrich, respectively. Table S3 shows additional information on analytical standards. For certain compounds, multiple names/abbreviations are shown in the tables due to inconsistencies in those identifiers between various relevant documentation (i.e., analytical standard product catalogues and other published methods cited in Table S4).

**Table S2. Project analyte list and analytical standard source**

| <b>Product Code</b>              | <b>Vendor</b> | <b>Compound acronym</b> | <b>Full Name</b>                                                      |
|----------------------------------|---------------|-------------------------|-----------------------------------------------------------------------|
| EPA-537PDS-R1<br>Native PFAS Mix | Wellington    | PFHxA                   | Perfluoro-n-hexanoic acid                                             |
|                                  |               | PFHpA                   | Perfluoro-n-heptanoic acid                                            |
|                                  |               | PFOA                    | Perfluoro-n-octanoic acid                                             |
|                                  |               | PFNA                    | Perfluoro-n-nonanoic acid                                             |
|                                  |               | PFDA                    | Perfluoro-n-decanoic acid                                             |
|                                  |               | PFUnA                   | Perfluoro-n-undecanoic acid                                           |
|                                  |               | PFDoA                   | Perfluoro-n-dodecanoic acid                                           |
|                                  |               | PFTrDA                  | Perfluoro-n-tridecanoic acid                                          |
|                                  |               | PFTeDA                  | Perfluoro-n-tetradecanoic acid                                        |
|                                  |               | HFPO-DA                 | 2,3,3,3-Tetrafluoro-2-(1,1,2,2,3,3-heptafluoropropoxy)-propanoic acid |
|                                  |               | N-MeFOSAA               | N-methyl perfluorooctanesulfonamidoacetic acid                        |
|                                  |               | N-EtFOSAA               | N-ethyl perfluorooctanesulfonamidoacetic acid                         |
|                                  |               | PFBS                    | Perfluoro-1-butanesulfonic acid                                       |
|                                  |               | PFHxS                   | Perfluoro-1-hexanesulfonic acid                                       |
|                                  |               | PFOS                    | Perfluoro-1-octanesulfonic acid                                       |
| PFBA                             | Wellington    | PFBA                    | Perfluoro-n-butanoic acid                                             |
| PFPeA                            | Wellington    | PFPeA                   | Perfluoro-n-pentanoic acid                                            |
| L-PFPeS                          | Wellington    | PFPeS                   | Perfluoro-1-pentanesulfonic acid                                      |
| L-PFHpS                          | Wellington    | PFHpS                   | Perfluoro-1-heptanesulfonic acid                                      |
| L-PFNS                           | Wellington    | PFNS                    | Perfluoro-1-nonanesulfonic acid                                       |
| L-PFDS                           | Wellington    | PFDS                    | Perfluoro-1-decanesulfonic acid                                       |



| Product Code | Vendor            | Compound acronym  | Full Name                                                            |
|--------------|-------------------|-------------------|----------------------------------------------------------------------|
| L-PFDoS      | Wellington        | PFDoS             | Perfluoro-1-dodecanesulfonic acid                                    |
| 4:2 FTSA     | Wellington        | 4:2 FTSA          | 1H,1H,2H,2H-Perfluorohexane sulphonic acid                           |
| 6:2 FTS      | Cambridge Isotope | 6:2 FTSA          | 1H,1H,2H,2H-Tridecafluorooctane-1-sulphonic acid                     |
| 8:2 FTS      | Cambridge Isotope | 8:2 FTSA          | 1H,1H,2H,2H-Perfluorodecanesulphonic acid                            |
| 10:2 FTS     | Wellington        | 10:2 FTSA         | 1H,1H,2H,2H-Perfluorododecane sulfonic acid                          |
| FOSA-I       | Wellington        | PFOSA             | Perfluorooctanesulphonamide                                          |
| N-MeFOSA     | Cambridge Isotope | N-MeFOSA          | N-Methyl Perfluorooctanesulfonamide                                  |
| N-EtFOSA     | Cambridge Isotope | N-EtFOSA          | N-Ethyl Perfluorooctanesulfonamide                                   |
| N-MeFOSE     | Cambridge Isotope | N-MeFOSE          | 2-(N-methylperfluoro-1-octanesulfonamido)-ethanol                    |
| N-EtFOSE     | Cambridge Isotope | N-EtFOSE          | 2-(N-ethylperfluoro-1-octanesulfonamido)-ethanol                     |
| PFECHS       | Wellington        | PFECHS            | Perfluoro-4-ethylcyclohexanesulfonic acid                            |
| L-PFPrS      | Wellington        | PFPrS             | Perfluoro-1-propanesulfonic acid                                     |
| PFBSA        | Cambridge Isotope | PFBSA             | Perfluorobutanesulfonamide                                           |
| PFHxSA       | Cambridge Isotope | PFHxSA            | Perfluorohexanesulfonamide                                           |
| FPrPA        | Wellington        | FPrPA/3:3<br>FTCA | 3-Perfluoropropyl propanoic acid / 3:3 fluorotelomer carboxylic acid |
| FPePA        | Wellington        | FPePA/5:3<br>FTCA | 3-Perfluoropentyl propanoic acid / 5:3 fluorotelomer carboxylic acid |
| FHpPA        | Wellington        | FHpPA/7:3<br>FTCA | 3-Perfluoroheptyl propanoic acid / 7:3 fluorotelomer carboxylic acid |

| Product Code | Vendor     | Compound acronym    | Full Name                                                                       |
|--------------|------------|---------------------|---------------------------------------------------------------------------------|
| FHUEA        | Wellington | FHUEA/6:2<br>FTUCA  | 2H-Perfluoro-2-octenoic acid / 6:2 fluorotelomer unsaturated carboxylic acid    |
| FOUEA        | Wellington | FOUEA/8:2<br>FTUCA  | 2H-Perfluoro-2-decenoic acid / 8:2 fluorotelomer unsaturated carboxylic acid    |
| FDUEA        | Wellington | FDUEA/10:2<br>FTUCA | 2H-Perfluoro-2-dodecenoic acid / 10:2 fluorotelomer unsaturated carboxylic acid |

**Table S3. Project extracted internal standard list and analytical standard source**

| Product Code                          | Vendor     | Mass-labeled compound acronym        |
|---------------------------------------|------------|--------------------------------------|
| MPFAC-24ES Mass Labelled PFAS Mix     | Wellington | <sup>13</sup> C <sub>4</sub> -PFBA   |
|                                       |            | <sup>13</sup> C <sub>5</sub> -PFPeA  |
|                                       |            | <sup>13</sup> C <sub>5</sub> -PFHxA  |
|                                       |            | <sup>13</sup> C <sub>4</sub> -PFHpA  |
|                                       |            | <sup>13</sup> C <sub>8</sub> -PFOA   |
|                                       |            | <sup>13</sup> C <sub>9</sub> -PFNA   |
|                                       |            | <sup>13</sup> C <sub>6</sub> -PFDA   |
|                                       |            | <sup>13</sup> C <sub>7</sub> -PFUnA  |
|                                       |            | <sup>13</sup> C <sub>2</sub> -PFDoA  |
|                                       |            | <sup>13</sup> C <sub>2</sub> -PFTeDA |
|                                       |            | <sup>13</sup> C <sub>8</sub> -PFOSA  |
|                                       |            | d <sub>3</sub> -N-MeFOSAA            |
|                                       |            | d <sub>5</sub> -N-EtFOSAA            |
|                                       |            | <sup>13</sup> C <sub>3</sub> -PFBS   |
|                                       |            | <sup>13</sup> C <sub>3</sub> -PFHxS  |
|                                       |            | <sup>13</sup> C <sub>8</sub> -PFOS   |
| <sup>13</sup> C <sub>2</sub> -4:2FTSA |            |                                      |
| <sup>13</sup> C <sub>2</sub> -6:2FTSA |            |                                      |

| Product Code       | Vendor            | Mass-labeled compound acronym                          |
|--------------------|-------------------|--------------------------------------------------------|
|                    |                   | <sup>13</sup> C <sub>2</sub> -8:2FTSA                  |
| M3HFPO-DA          | Wellington        | <sup>13</sup> C <sub>3</sub> -HFPO-DA                  |
| d3-N-MeFOSA-M      | Wellington        | d <sub>3</sub> -N-MeFOSA                               |
| d5-N-EtFOSA-M      | Wellington        | d <sub>5</sub> -N-EtFOSA                               |
| d7-N-MeFOSE-M      | Wellington        | d <sub>7</sub> -N-MeFOSE                               |
| d9-N-EtFOSE-M      | Wellington        | d <sub>9</sub> -N-EtFOSE                               |
| MFHUEA             | Wellington        | <sup>13</sup> C <sub>2</sub> -FHUEA                    |
| MFOUEA             | Wellington        | <sup>13</sup> C <sub>2</sub> -FOUEA                    |
| MFDUEA             | Wellington        | <sup>13</sup> C <sub>2</sub> -FDUEA                    |
| 13C2, D4, 10:2 FTS | Cambridge Isotope | <sup>13</sup> C <sub>2</sub> D <sub>4</sub> -10:2 FTSA |

The rationale for the choice of extracted internal standards is provided in Table S4. For PFECHS, the extracted internal standard in OTM-45<sup>2</sup> is <sup>18</sup>O<sub>2</sub>-PFHxS. During method development, PFECHS was quantitated with both <sup>13</sup>C<sub>8</sub>-PFOS and <sup>13</sup>C<sub>3</sub>-PFHxS. Recoveries using <sup>13</sup>C<sub>3</sub>-PFHxS were equal or better when compared to recoveries using <sup>13</sup>C<sub>8</sub>-PFOS. Since recoveries using <sup>13</sup>C<sub>3</sub>-PFHxS were equal or better than using <sup>13</sup>C<sub>8</sub>-PFOS and OTM-45 also uses labeled PFHxS (just a different isotope), <sup>13</sup>C<sub>3</sub>-PFHxS was chosen as the extracted internal standard. The extracted internal standard recovery was used to adjust target analyte concentrations.

**Table S4. PFAS analytes, WI public health values and extracted internal standards. Classes of PFAS within the analyte list are shown in italics on rows preceding each group.**

| Acronym                                                                        | CAS number | 2019/2020 Wisconsin public health value (ng L <sup>-1</sup> ) | Mass-labeled compound acronym       | Mass-labeled compound acronym reference/ rationale |
|--------------------------------------------------------------------------------|------------|---------------------------------------------------------------|-------------------------------------|----------------------------------------------------|
| <i>Perfluoroalkyl carboxylic acids (terminal compounds in the environment)</i> |            |                                                               |                                     |                                                    |
| PFBA                                                                           | 375-22-4   | 10,000                                                        | <sup>13</sup> C <sub>4</sub> -PFBA  | EPA Draft Method 1633                              |
| PFPeA                                                                          | 2706-90-3  |                                                               | <sup>13</sup> C <sub>5</sub> -PFPeA | EPA Draft Method 1633                              |

| Acronym                                                                                                                        | CAS number  | 2019/2020 Wisconsin public health value (ng L <sup>-1</sup> ) | Mass-labeled compound acronym        | Mass-labeled compound acronym reference/rationale                                                                            |
|--------------------------------------------------------------------------------------------------------------------------------|-------------|---------------------------------------------------------------|--------------------------------------|------------------------------------------------------------------------------------------------------------------------------|
| PFHxA                                                                                                                          | 307-24-4    | 150,000                                                       | <sup>13</sup> C <sub>5</sub> -PFHxA  | EPA Draft Method 1633                                                                                                        |
| PFHpA                                                                                                                          | 375-85-9    |                                                               | <sup>13</sup> C <sub>4</sub> -PFHpA  | EPA Draft Method 1633                                                                                                        |
| PFOA                                                                                                                           | 335-67-1    | 20 <sup>1</sup>                                               | <sup>13</sup> C <sub>8</sub> -PFOA   | EPA Draft Method 1633                                                                                                        |
| PFNA                                                                                                                           | 375-95-1    | 30                                                            | <sup>13</sup> C <sub>9</sub> -PFNA   | EPA Draft Method 1633                                                                                                        |
| PFDA                                                                                                                           | 335-76-2    | 300                                                           | <sup>13</sup> C <sub>6</sub> -PFDA   | EPA Draft Method 1633                                                                                                        |
| PFUnA                                                                                                                          | 2058-94-8   | 3,000                                                         | <sup>13</sup> C <sub>7</sub> -PFUnA  | EPA Draft Method 1633                                                                                                        |
| PFDoA                                                                                                                          | 307-55-1    | 500                                                           | <sup>13</sup> C <sub>2</sub> -PFDoA  | EPA Draft Method 1633                                                                                                        |
| PFTTrDA                                                                                                                        | 72629-94-8  |                                                               | <sup>13</sup> C <sub>2</sub> -PFDoA  | EPA Draft Method 1633<br>uses the average of<br><sup>13</sup> C <sub>2</sub> -PFTeDA and <sup>13</sup> C <sub>2</sub> -PFDoA |
| PFTeDA                                                                                                                         | 376-06-7    | 10,000                                                        | <sup>13</sup> C <sub>2</sub> -PFTeDA | EPA Draft Method 1633                                                                                                        |
| <i>Perfluoroalkyl sulfonic acids (terminal compounds in the environment)</i>                                                   |             |                                                               |                                      |                                                                                                                              |
| PFPrS                                                                                                                          | 423-41-6    |                                                               | <sup>13</sup> C <sub>3</sub> -PFBS   | Barzen-Hanson and Field (2015)                                                                                               |
| PFBS                                                                                                                           | 375-73-5    | 450,000                                                       | <sup>13</sup> C <sub>3</sub> -PFBS   | EPA Draft Method 1633                                                                                                        |
| PFPeS                                                                                                                          | 2706-91-4   |                                                               | <sup>13</sup> C <sub>3</sub> -PFHxS  | EPA Draft Method 1633                                                                                                        |
| PFHxS                                                                                                                          | 355-46-4    | 40                                                            | <sup>13</sup> C <sub>3</sub> -PFHxS  | EPA Draft Method 1633                                                                                                        |
| PFHpS                                                                                                                          | 375-92-8    |                                                               | <sup>13</sup> C <sub>8</sub> -PFOS   | EPA Draft Method 1633                                                                                                        |
| PFOS                                                                                                                           | 1763-23-1   | 20 <sup>1</sup>                                               | <sup>13</sup> C <sub>8</sub> -PFOS   | EPA Draft Method 1633                                                                                                        |
| PFNS                                                                                                                           | 68259-12-1  |                                                               | <sup>13</sup> C <sub>8</sub> -PFOS   | EPA Draft Method 1633                                                                                                        |
| PFDS                                                                                                                           | 335-77-3    |                                                               | <sup>13</sup> C <sub>8</sub> -PFOS   | EPA Draft Method 1633                                                                                                        |
| PFDoS                                                                                                                          | 79780-39-5  |                                                               | <sup>13</sup> C <sub>8</sub> -PFOS   | EPA Draft Method 1633                                                                                                        |
| <i>n:2 fluorotelomer sulfonic acids (precursors in the environment of other PFAS including PFCAs of varying chain lengths)</i> |             |                                                               |                                      |                                                                                                                              |
| 4:2 FTSA                                                                                                                       | 757124-72-4 |                                                               | <sup>13</sup> C <sub>2</sub> -4:2FTS | EPA Draft Method 1633                                                                                                        |
| 6:2 FTSA                                                                                                                       | 27619-97-2  |                                                               | <sup>13</sup> C <sub>2</sub> -6:2FTS | EPA Draft Method 1633                                                                                                        |

| Acronym                                                                                                                                                                        | CAS number  | 2019/2020 Wisconsin public health value (ng L <sup>-1</sup> ) | Mass-labeled compound acronym           | Mass-labeled compound acronym reference/rationale |
|--------------------------------------------------------------------------------------------------------------------------------------------------------------------------------|-------------|---------------------------------------------------------------|-----------------------------------------|---------------------------------------------------|
| 8:2 FTSA                                                                                                                                                                       | 39108-34-4  |                                                               | <sup>13</sup> C <sub>2</sub> -8:2FTS    | EPA Draft Method 1633                             |
| 10:2 FTSA                                                                                                                                                                      | 120226-60-0 |                                                               | <sup>13</sup> C <sub>2</sub> -10:2FTS   | Exact isotope label                               |
| <i>Fluorotelomer n:3 saturated (likely terminal compounds in the environment) and n:2 unsaturated (precursors/environmental intermediates) carboxylic acids</i>                |             |                                                               |                                         |                                                   |
| 3:3 FTCA                                                                                                                                                                       | 356-02-5    |                                                               | <sup>13</sup> C <sub>4</sub> -PFPeA     | EPA Draft Method 1633                             |
| 5:3 FTCA                                                                                                                                                                       | 914637-49-3 |                                                               | <sup>13</sup> C <sub>5</sub> -PFHxA     | EPA Draft Method 1633                             |
| 7:3 FTCA                                                                                                                                                                       | 812-70-4    |                                                               | <sup>13</sup> C <sub>5</sub> -PFHxA     | EPA Draft Method 1633                             |
| 6:2 FTUCA                                                                                                                                                                      | 70887-86-6  |                                                               | <sup>13</sup> C <sub>2</sub> -6:2FTUCA  | Exact isotope label; OTM 45                       |
| 8:2 FTUCA                                                                                                                                                                      | 70887-84-2  |                                                               | <sup>13</sup> C <sub>2</sub> -8:2FTUCA  | Exact isotope label; OTM 45                       |
| 10:2 FTUCA                                                                                                                                                                     | 70887-94-4  |                                                               | <sup>13</sup> C <sub>2</sub> -10:2FTUCA | Exact isotope label                               |
| <i>Fluorosulfonamide/sulfonamido substances (PFBSA and PFHxSA are likely precursors in the environment of PFBS and PFHxS, respectively; all others are precursors of PFOS)</i> |             |                                                               |                                         |                                                   |
| PFBSA                                                                                                                                                                          | 30334-69-1  |                                                               | <sup>13</sup> C <sub>3</sub> -PFHxS     | Meng et al. (2022)                                |
| PFHxSA                                                                                                                                                                         | 41997-13-1  |                                                               | <sup>13</sup> C <sub>8</sub> -PFOS      | Meng et al. (2022)                                |
| PFOSA                                                                                                                                                                          | 754-91-6    | 20 <sup>1</sup>                                               | <sup>13</sup> C <sub>8</sub> -PFOSA     | EPA Draft Method 1633                             |
| N-MeFOSA                                                                                                                                                                       | 31506-32-8  |                                                               | D3-NMeFOSA                              | EPA Draft Method 1633                             |
| N-MeFOSE                                                                                                                                                                       | 24448-09-7  |                                                               | D7-NMeFOSE                              | EPA Draft Method 1633                             |
| N-EtFOSA                                                                                                                                                                       | 4151-50-2   | 20 <sup>1</sup>                                               | D5-NEtFOSA                              | EPA Draft Method 1633                             |
| N-EtFOSE                                                                                                                                                                       | 1691-99-2   | 20 <sup>1</sup>                                               | D9-NEtFOSE                              | EPA Draft Method 1633                             |
| N-MeFOSAA                                                                                                                                                                      | 2355-31-9   |                                                               | D3-NMeFOSAA                             | EPA Draft Method 1633                             |
| N-EtFOSAA                                                                                                                                                                      | 2991-50-6   | 20 <sup>1</sup>                                               | D5-N-EtFOSAA                            | EPA Draft Method 1633                             |
| <i>Ether-containing fluorosubstances</i>                                                                                                                                       |             |                                                               |                                         |                                                   |
| HFPO-DA                                                                                                                                                                        | 13252-13-6  | 300                                                           | <sup>13</sup> C <sub>3</sub> -HFPO-DA   | EPA Draft Method 1633                             |
| DONA                                                                                                                                                                           | 919005-14-4 | 3,000                                                         | <sup>13</sup> C <sub>4</sub> -PFHpA     | EPA Method 533                                    |
| 9CI-PF3ONS                                                                                                                                                                     | 756426-58-1 |                                                               | <sup>13</sup> C <sub>8</sub> -PFOS      | EPA Method 533                                    |
| 11CI-PF3OUdS                                                                                                                                                                   | 763051-92-9 |                                                               | <sup>13</sup> C <sub>8</sub> -PFOS      | EPA Method 533                                    |

| Acronym                        | CAS number  | 2019/2020 Wisconsin public health value (ng L <sup>-1</sup> ) | Mass-labeled compound acronym       | Mass-labeled compound acronym reference/rationale |
|--------------------------------|-------------|---------------------------------------------------------------|-------------------------------------|---------------------------------------------------|
| <i>Cyclic analogue of PFOS</i> |             |                                                               |                                     |                                                   |
| PFECHS                         | 133201-07-7 |                                                               | <sup>13</sup> C <sub>3</sub> -PFHxS | See text                                          |

Notes (excluding isotope superscripts):

- 1) Superscript<sup>1</sup>: Wisconsin health advisory level of 20 ng L<sup>-1</sup> applies to the sum of detected concentrations of PFOA, PFOS, PFOSA, NEtFOSA, NEtFOSAA and NEtFOSE.
- 2) In the reference list at the end of the document: OTM 45<sup>2</sup>, EPA Draft Method 1633<sup>3</sup>, Barzen-Hanson and Field (2015)<sup>4</sup>, Meng et al. (2022)<sup>5</sup>; EPA Method 533<sup>6</sup>

### 1.3.2 PFAS extraction

Samples were extracted with a PromoChrom automated extraction system (AES). If samples contained light particulates, a PromoChrom in-line filter was used to prevent contamination and damage to AES lines and pumps.

Internal standard mix was added to each quality control sample and field sample, in the bottle in which it was collected, and allowed to equilibrate for a minimum of fifteen minutes. AES lines were rinsed with water and methanol before each extraction.

SPE cartridges were pre-conditioned in three separate steps with 4 mL ammonium hydroxide in methanol, methanol, and water, rinsing at a flow rate of 5 mL min<sup>-1</sup> for each solvent. Samples were then added to the SPE cartridges in ~4 mL increments at a flow rate of 3 mL min<sup>-1</sup>. After the entire samples passed through the cartridges, 4 mL each of water and 25 mM ammonium acetate buffer were added successively at 3 mL min<sup>-1</sup>. Cartridges were then blown to dryness with 4 mL of air flowing at 10 mL min<sup>-1</sup> through each cartridge followed by nitrogen flow at approximately 10 L min<sup>-1</sup> for 10 minutes.

At the elution step, each cartridge was rinsed with 4 mL methanol at a rate of 0.5 mL min<sup>-1</sup> (the sample bottle and in-line filter are rinsed first with this methanol), followed by 4 mL 60mM ammonium hydroxide in methanol at 0.5 mL min<sup>-1</sup>. Extracts were collected in 15-mL polypropylene centrifuge tubes. Extracts were further filtered through a graphitized carbon black (ENVI-Carb) cartridge immediately after the initial

SPE step. The carbon SPE cartridge was rinsed with at least 6 mL 60mM ammonium hydroxide in methanol before samples were loaded. Sample extracts were added to rinsed cartridges at about 3-5 mL min<sup>-1</sup> and collected in 15-mL polypropylene centrifuge tubes.

Filtered extracts were evaporated to between 0.5-1 mL under a gentle stream of nitrogen (~0.7 L min<sup>-1</sup>) in a heated water bath at 60-65°C. Sample volume was adjusted to exactly 1 mL with MeOH before extracts were filtered through a glass fiber filter or polypropylene syringe filter.

### 1.3.3 PFAS Analysis by HPLC-MS/MS

Analysis was performed on a Waters Acquity UPLC followed by an Applied Biosystems/SCIEX Q-Trap 5500 triple quadrupole mass spectrometer:

Analytical column: Acquity UPLC BEH C18 1.7 MM 2.1x50 mm

Isolator column: Acquity UPLC Reverse-phase BEH 2.1x50 mm

Injection volume: 2 µL

Mobile Phase: (A) 2 mM ammonium acetate in H<sub>2</sub>O:MeOH (95:5), (B) MeOH

Column temperature: 40°C

#### Steps - Table S5:

| Step | Total Time (min) | Flow Rate (mL/min) | A (%) | B (%) |
|------|------------------|--------------------|-------|-------|
| 0    | 0.00             | 0.200              | 95    | 5     |
| 1    | 0.50             | 0.200              | 95    | 5     |
| 2    | 1                | 0.250              | 80    | 20    |
| 3    | 4                | 0.350              | 50    | 50    |
| 4    | 6                | 0.350              | 40    | 60    |
| 5    | 7                | 0.400              | 30    | 70    |
| 6    | 8.5              | 0.400              | 10    | 90    |
| 7    | 9                | 0.350              | 0     | 100   |
| 8    | 10.5             | 0.300              | 0     | 100   |
| 9    | 11.5             | 0.200              | 95    | 5     |
| 10   | 13.5             | 0.200              | 95    | 5     |

Analysis performed on a SCIEX ExionLC followed by an Applied Biosystems/SCIEX Triple Quad 7500 mass spectrometer:

Analytical column: Acquity UPLC BEH C18 1.7 MM 2.1x50 mm Column

Isolator column: Acquity UPLC Hybrid Reversed Phase 2.1x50 mm

Injection volume: 1 µL

Mobile Phase: (A) 2 mM ammonium acetate in H<sub>2</sub>O:MeOH (95:5), (B) Methanol

Column temperature: 40°C

**Steps - Table S6:**

| Step | Time (min) | Flow (mL/min) | A (%) | B (%) |
|------|------------|---------------|-------|-------|
| 0    | 0.0        | 0.300         | 95    | 5     |
| 1    | 0.2        | 0.300         | 95    | 5     |
| 2    | 0.5        | 0.300         | 80    | 20    |
| 3    | 3.0        | 0.300         | 65    | 35    |
| 4    | 3.5        | 0.300         | 45    | 55    |
| 5    | 11.5       | 0.300         | 5     | 95    |
| 6    | 12.5       | 0.300         | 5     | 95    |
| 7    | 12.6       | 0.300         | 95    | 5     |
| 8    | 15.0       | 0.300         | 95    | 5     |

#### 1.3.4 PFAS Quality control and quantitation

An initial demonstration of capability was performed, including demonstrating low LC system background calibration verification using a quality control standard (a calibration standard purchased and prepared separately from calibration solutions, which must be 70 – 130% of the true value), precision of solid-phase extraction (SPE; %RSD <30% for four replicates), accuracy of solid-phase extraction (average recovery within 65 – 135% for each analyte in four replicates), and determination of method detection limits (MDLs) (based on 40 CFR Appendix B to Part 136 guidelines) (Table S7). Ongoing quality control included analysis of method blanks (Milli-Q water, extracted by SPE), laboratory control spikes (Milli-Q water spiked with



analytes, extracted by SPE), and field duplicates, each performed for every extraction batch. Calibration checks were performed every 10 samples. Isotope dilution was performed by adding spikes of extracted internal standards in the sample bottle. Table S7 also shows the method reporting limit (MRL) for each compound. The MRL is the minimum concentration reported as a quantitative value for a method analyte in a sample following analysis. This defined concentration is no lower than the concentration of the lowest calibration standard for that analyte and is only used if the recovery in the lowest standard is within 50 – 150%. The extracted internal standard recovery was used to adjust target analyte concentrations. Calibration by isotope dilution was utilized for those PFAS with an exact mass-labeled isotope (Table S3). Calibration by internal standard was utilized for other compounds.

**Table S7. Method detection limits (MDLs) and method reporting limits (MRLs). MDLs in this table are for exactly 250 mL of sample; for median detection limits based on actual sample volumes, see Table 1 of the manuscript.**

| Analyte                                                               | Abbreviation(s) | CAS No.     | MDL (ng L <sup>-1</sup> ) | MRL (ng L <sup>-1</sup> ) |
|-----------------------------------------------------------------------|-----------------|-------------|---------------------------|---------------------------|
| Perfluoro-n-butanoic acid                                             | PFBA            | 375-22-4    | 0.346                     | 1.00                      |
| Perfluoro-1-propanesulfonic acid                                      | PFPrS           | 423-41-6    | 0.16                      | 1.00                      |
| 3-Perfluoropropyl propanoic acid                                      | FprPA, 3:3 FTCA | 356-02-5    | 0.119                     | 1.00                      |
| Perfluoro-n-pentanoic acid                                            | PFPeA           | 2706-90-3   | 0.15                      | 1.00                      |
| Perfluoro-1-butanefulfonic acid                                       | PFBS            | 375-73-5    | 0.124                     | 1.00                      |
| 1H,1H,2H,2H-Perfluorohexane sulphonic acid                            | 4:2 FTSA        | 757124-72-4 | 0.19                      | 1.00                      |
| Perfluoro-n-hexanoic acid                                             | PFHxA           | 307-24-4    | 0.204                     | 1.00                      |
| Perfluorobutane sulfonamide                                           | PFBSA           | 30334-69-1  | 0.16                      | 1.00                      |
| Perfluoro-1-pentanesulfonic acid                                      | PFPeS           | 2706-91-4   | 0.136                     | 1.00                      |
| 2,3,3,3-Tetrafluoro-2-(1,1,2,2,3,3-heptafluoropropoxy)-propanoic acid | HFPO-DA         | 13252-13-6  | 0.192                     | 1.00                      |
| Perfluoro-n-heptanoic acid                                            | PFHpA           | 375-85-9    | 0.15                      | 1.00                      |
| 3-Perfluoropentyl propanoic acid                                      | FpePA, 5:3 FTCA | 914637-49-3 | 0.118                     | 1.00                      |
| Perfluoro-1-hexanesulfonic acid                                       | PFHxS           | 355-46-4    | 0.142                     | 1.00                      |

| Analyte                                          | Abbreviation(s)     | CAS No.     | MDL (ng L <sup>-1</sup> ) | MRL (ng L <sup>-1</sup> ) |
|--------------------------------------------------|---------------------|-------------|---------------------------|---------------------------|
| Dodecafluoro-3H-4,8-dioxanonanoic acid           | DONA                | 919005-14-4 | 0.128                     | 1.00                      |
| 2H-Perfluoro-2-octenoic acid                     | FHUEA, 6:2<br>FTUCA | 70887-86-6  | 0.088                     | 1.00                      |
| Perfluoro-4-ethylcyclohexanesulfonic acid        | PFECHS              | 133201-07-7 | 0.127                     | 1.00                      |
| 1H,1H,2H,2H-Tridecafluorooctane-1-sulphonic acid | 6:2 FTSA            | 27619-97-2  | 0.272                     | 1.00                      |
| Perfluoro-n-octanoic acid                        | PFOA                | 335-67-1    | 0.108                     | 1.00                      |
| Perfluoro-1-heptanesulfonic acid                 | PFHpS               | 375-92-8    | 0.098                     | 1.00                      |
| Perfluorohexanesulfonamide                       | PFHxSA              | 41997-13-1  | 0.071                     | 1.00                      |
| Perfluoro-1-octanesulfonic acid                  | PFOS                | 1763-23-1   | 0.143                     | 1.00                      |
| Perfluoro-n-nonanoic acid                        | PFNA                | 375-95-1    | 0.148                     | 1.00                      |
| 3-Perfluoroheptyl propanoic acid                 | FhpPA, 7:3 FTCA     | 812-70-4    | 0.139                     | 1.00                      |
| 2H-Perfluoro-2-decenoic acid                     | FOUEA, 8:2<br>FTUCA | 70887-84-2  | 0.193                     | 1.00                      |
| 9-Chlorohexadecafluoro-3-oxanone-1-sulfonic acid | 9Cl-PF3ONS          | 756426-58-1 | 0.182                     | 1.00                      |
| 1H,1H,2H,2H-Perfluorodecanesulphonic acid        | 8:2 FTSA            | 39108-34-4  | 0.262                     | 1.00                      |
| Perfluoro-n-decanoic acid                        | PFDA                | 335-76-2    | 0.163                     | 1.00                      |
| Perfluoro-1-nonanesulfonic acid                  | PFNS                | 68259-12-1  | 0.182                     | 1.00                      |
| N-methyl perfluorooctanesulfonamidoacetic acid   | N-MeFOSAA           | 2355-31-9   | 0.219                     | 1.00                      |
| N-ethyl perfluorooctanesulfonamidoacetic acid    | N-EtFOSAA           | 2991-50-6   | 0.212                     | 1.00                      |
| Perfluorooctane sulfonamide                      | FOSA, PFOSAm        | 754-91-6    | 0.155                     | 1.00                      |
| Perfluoro-n-undecanoic acid                      | PFUnA, PFUdA        | 2058-94-8   | 0.222                     | 1.00                      |

| Analyte                                             | Abbreviation(s)      | CAS No.     | MDL (ng L <sup>-1</sup> ) | MRL (ng L <sup>-1</sup> ) |
|-----------------------------------------------------|----------------------|-------------|---------------------------|---------------------------|
| Perfluoro-1-decanesulfonic acid                     | PFDS                 | 335-77-3    | 0.11                      | 1.00                      |
| 2H-Perfluoro-2-dodecenoic acid                      | FDUEA, 10:2<br>FTUCA | 70887-94-4  | 0.186                     | 1.00                      |
| 11-Chloroeicosafluoro-3-oxaundecane-1-sulfonic acid | 11Cl-PF3OudS         | 763051-92-9 | 0.149                     | 1.00                      |
| 1H,1H,2H,2H-Perfluorododecane sulfonic acid         | 10:2 FTSA            | 120226-60-0 | 0.387                     | 1.00                      |
| Perfluoro-n-dodecanoic acid                         | PFDoA                | 307-55-1    | 0.135                     | 1.00                      |
| Perfluoro-1-dodecanesulfonic acid                   | PFDoS                | 79780-39-5  | 0.247                     | 1.00                      |
| Perfluoro-n-tridecanoic acid                        | PFTrDA               | 72629-94-8  | 0.193                     | 1.00                      |
| N-Methyl Perfluorooctanesulfonamide                 | N-MeFOSA             | 31506-32-8  | 1.00                      | 2.00                      |
| 2-(N-methylperfluoro-1-octanesulfonamido)-ethanol   | N-MeFOSE             | 24448-09-7  | 0.281                     | 1.00                      |
| N-Ethyl Perfluorooctanesulfonamide                  | N-EtFOSA             | 4151-50-2   | 0.694                     | 2.00                      |
| 2-(N-ethylperfluoro-1-octanesulfonamido)-ethanol    | N-EtFOSE             | 1691-99-2   | 0.212                     | 1.00                      |
| Perfluoro-n-tetradecanoic acid                      | PFTeDA               | 376-06-7    | 0.175                     | 1.00                      |

**Table S8. Method blank data (n=52).**

| Compound Name (CAS No.) | Mean (ng L <sup>-1</sup> ) | Max (ng L <sup>-1</sup> ) |
|-------------------------|----------------------------|---------------------------|
| PFBA (375-22-4)         | 0.026                      | 0.527                     |
| PFPeA (2706-90-3)       | 0.011                      | 0.457                     |
| PFBS (375-73-5)         | 0.000                      | 0.000                     |
| 4:2 FTSA (757124-72-4)  | 0.000                      | 0.000                     |
| PFHxA (307-24-4)        | 0.014                      | 0.536                     |
| PFPeS (2706-91-4)       | 0.000                      | 0.000                     |
| HFPO-DA (13252-13-6)    | 0.000                      | 0.000                     |
| PFHpA (375-85-9)        | 0.009                      | 0.282                     |

| Compound Name (CAS No.)    | Mean (ng L <sup>-1</sup> ) | Max (ng L <sup>-1</sup> ) |
|----------------------------|----------------------------|---------------------------|
| PFHxS (355-46-4)           | 0.001                      | 0.043                     |
| DONA (919005-14-4)         | 0.000                      | 0.011                     |
| 6:2 FTSA (27619-97-2)      | 0.031                      | 0.933                     |
| PFOA (335-67-1)            | 0.044                      | 0.587                     |
| PFHpS (375-92-8)           | 0.000                      | 0.000                     |
| PFOS (1763-23-1)           | 0.003                      | 0.177                     |
| PFNA (375-95-1)            | 0.012                      | 0.536                     |
| 9Cl-PF3ONS (756426-58-1)   | 0.000                      | 0.000                     |
| 8:2 FTSA (39108-34-4)      | 0.000                      | 0.000                     |
| PFDA (335-76-2)            | 0.014                      | 0.431                     |
| PFNS (68259-12-1)          | 0.000                      | 0.000                     |
| N-MeFOSAA (2355-31-9)      | 0.000                      | 0.000                     |
| N-EtFOSAA (2991-50-6)      | 0.000                      | 0.000                     |
| FOSA (754-91-6)            | 0.004                      | 0.115                     |
| PFUnA (2058-94-8)          | 0.008                      | 0.262                     |
| PFDS (335-77-3)            | 0.000                      | 0.000                     |
| 11Cl-PF3OudS (763051-92-9) | 0.000                      | 0.000                     |
| PFDoA (307-55-1)           | 0.008                      | 0.306                     |
| PFDoS (79780-39-5)         | 0.000                      | 0.000                     |
| PFTTrDA (72629-94-8)       | 0.001                      | 0.030                     |
| N-MeFOSA (31506-32-8)      | 0.006                      | 0.119                     |
| N-MeFOSE (24448-09-7)      | 0.001                      | 0.063                     |
| N-EtFOSA (4151-50-2)       | 0.005                      | 0.080                     |
| N-EtFOSE (1691-99-2)       | 0.006                      | 0.275                     |
| PFTeDA (376-06-7)          | 0.006                      | 0.235                     |
| 10:2 FTSA (120226-60-0)    | 0.002                      | 0.020                     |
| PFPrS (423-41-6)           | 0.000                      | 0.000                     |
| FprPA (356-02-5)           | 0.000                      | 0.000                     |
| PFBSA (30334-69-1)         | 0.000                      | 0.000                     |
| FpePA (914637-49-3)        | 0.000                      | 0.000                     |

| Compound Name (CAS No.) | Mean (ng L <sup>-1</sup> ) | Max (ng L <sup>-1</sup> ) |
|-------------------------|----------------------------|---------------------------|
| FHUEA (70887-88-6)      | 0.002                      | 0.058                     |
| PFECHS (133201-07-7)    | 0.002                      | 0.064                     |
| PFHxSA (41997-13-1)     | 0.000                      | 0.000                     |
| FhpPA (812-70-4)        | 0.002                      | 0.109                     |
| FOUEA (70887-84-2)      | 0.001                      | 0.071                     |
| FDUEA (70887-94-4)      | 0.000                      | 0.022                     |

**Table S9. Control spike data. LCS nominally spiked at 1 ng L<sup>-1</sup> (2 ng L<sup>-1</sup> for PFBA), LCS1 nominally spiked at 10 ng L<sup>-1</sup> (20 ng L<sup>-1</sup> for PFBA), and LCS2 nominally spiked at 40 ng L<sup>-1</sup> (80 ng L<sup>-1</sup> for PFBA). Units for all values in Table are ng L<sup>-1</sup>.**

| Compound Name (CAS No.) | LCS (n=19) |     |     | LCS1 (n=19) |     |     | LCS2 (n=15) |     |     |
|-------------------------|------------|-----|-----|-------------|-----|-----|-------------|-----|-----|
|                         | Average    | Min | Max | Average     | Min | Max | Average     | Min | Max |
| PFBA (375-22-4)         | 117        | 80  | 165 | 87          | 74  | 104 | 107         | 96  | 125 |
| PFPeA (2706-90-3)       | 116        | 85  | 153 | 87          | 74  | 108 | 106         | 94  | 124 |
| PFBS (375-73-5)         | 112        | 79  | 153 | 87          | 76  | 110 | 107         | 94  | 129 |
| 4:2 FTSA (757124-72-4)  | 106        | 73  | 155 | 81          | 67  | 96  | 100         | 87  | 112 |
| PFHxA (307-24-4)        | 115        | 82  | 169 | 89          | 75  | 112 | 109         | 93  | 130 |
| PFPeS (2706-91-4)       | 116        | 79  | 149 | 86          | 61  | 99  | 109         | 94  | 122 |
| HFPO-DA (13252-13-6)    | 113        | 77  | 141 | 84          | 70  | 111 | 107         | 88  | 129 |
| PFHpA (375-85-9)        | 111        | 69  | 163 | 85          | 74  | 102 | 108         | 93  | 131 |
| PFHxS (355-46-4)        | 113        | 79  | 140 | 85          | 64  | 113 | 106         | 91  | 131 |
| DONA (919005-14-4)      | 118        | 90  | 157 | 89          | 75  | 117 | 109         | 90  | 138 |
| 6:2 FTSA (27619-97-2)   | 107        | 73  | 148 | 83          | 73  | 101 | 102         | 89  | 117 |
| PFOA (335-67-1)         | 120        | 86  | 171 | 87          | 73  | 103 | 106         | 88  | 128 |
| PFHpS (375-92-8)        | 117        | 80  | 159 | 89          | 75  | 103 | 110         | 98  | 131 |
| PFOS (1763-23-1)        | 113        | 80  | 138 | 86          | 65  | 114 | 108         | 97  | 134 |
| PFNA (375-95-1)         | 115        | 83  | 157 | 85          | 73  | 118 | 106         | 83  | 136 |

|                            |     |    |     |     |    |     |     |     |     |
|----------------------------|-----|----|-----|-----|----|-----|-----|-----|-----|
| 9CI-PF3ONS (756426-58-1)   | 96  | 67 | 138 | 78  | 56 | 93  | 95  | 71  | 111 |
| 8:2 FTSA (39108-34-4)      | 109 | 78 | 154 | 86  | 76 | 101 | 103 | 92  | 120 |
| PFDA (335-76-2)            | 115 | 81 | 144 | 87  | 75 | 114 | 105 | 92  | 136 |
| PFNS (68259-12-1)          | 105 | 81 | 153 | 82  | 69 | 103 | 101 | 90  | 118 |
| N-MeFOSAA (2355-31-9)      | 108 | 68 | 139 | 88  | 74 | 109 | 108 | 95  | 130 |
| N-EtFOSAA (2991-50-6)      | 107 | 73 | 146 | 86  | 72 | 107 | 107 | 92  | 134 |
| FOSA (754-91-6)            | 109 | 64 | 164 | 84  | 72 | 100 | 107 | 95  | 121 |
| PFUnA (2058-94-8)          | 108 | 78 | 152 | 87  | 68 | 111 | 106 | 91  | 134 |
| PFDS (335-77-3)            | 94  | 65 | 124 | 76  | 59 | 95  | 96  | 81  | 121 |
| 11CI-PF3OudS (763051-92-9) | 97  | 75 | 123 | 80  | 64 | 107 | 99  | 82  | 133 |
| PFDaA (307-55-1)           | 107 | 72 | 133 | 87  | 65 | 118 | 108 | 91  | 136 |
| PFDoS (79780-39-5)         | 88  | 42 | 121 | 66  | 38 | 94  | 92  | 73  | 108 |
| PFTrDA (72629-94-8)        | 98  | 55 | 149 | 83  | 67 | 117 | 102 | 81  | 121 |
| N-MeFOSA (31506-32-8)      | 107 | 51 | 142 | 85  | 74 | 102 | 113 | 99  | 155 |
| N-MeFOSE (24448-09-7)      | 110 | 59 | 148 | 82  | 63 | 96  | 108 | 95  | 123 |
| N-EtFOSA (4151-50-2)       | 104 | 35 | 170 | 85  | 69 | 99  | 113 | 101 | 138 |
| N-EtFOSE (1691-99-2)       | 104 | 62 | 155 | 81  | 64 | 100 | 103 | 84  | 122 |
| PFTeDA (376-06-7)          | 111 | 65 | 148 | 85  | 69 | 110 | 108 | 93  | 135 |
| 10:2 FTSA (120226-60-0)    | 103 | 66 | 161 | 82  | 67 | 104 | 103 | 91  | 123 |
| PFPrS (423-41-6)           | 104 | 78 | 135 | 79  | 68 | 103 | 101 | 86  | 117 |
| FprPA (356-02-5)           | 105 | 70 | 131 | 81  | 66 | 113 | 103 | 90  | 131 |
| PFBSA (30334-69-1)         | 138 | 77 | 177 | 101 | 68 | 164 | 127 | 103 | 174 |
| FpePA (914637-49-3)        | 108 | 77 | 154 | 84  | 63 | 105 | 104 | 94  | 119 |
| FHUEA (70887-88-6)         | 110 | 64 | 150 | 85  | 70 | 105 | 103 | 90  | 129 |
| PFECHS (133201-07-7)       | 106 | 69 | 146 | 82  | 58 | 100 | 102 | 90  | 123 |
| PFHxSA (41997-13-1)        | 129 | 77 | 184 | 101 | 68 | 172 | 129 | 101 | 173 |
| FhpPA (812-70-4)           | 101 | 55 | 146 | 79  | 63 | 103 | 100 | 86  | 117 |
| FOUEA (70887-84-2)         | 108 | 63 | 138 | 82  | 65 | 113 | 108 | 95  | 130 |
| FDUEA (70887-94-4)         | 107 | 82 | 149 | 84  | 63 | 103 | 107 | 90  | 119 |

**Table S10. Instrument calibration check standard recoveries (n=65). Injection of calibration standard at nominal concentration of 1 ng L<sup>-1</sup> (2 ng L<sup>-1</sup> for PFBA).**

| Compound Name (CAS No.)    | Average (ng L <sup>-1</sup> ) | Min (ng L <sup>-1</sup> ) | Max (ng L <sup>-1</sup> ) |
|----------------------------|-------------------------------|---------------------------|---------------------------|
| PFBA (375-22-4)            | 96                            | 72                        | 111                       |
| PFPeA (2706-90-3)          | 98                            | 88                        | 120                       |
| PFBS (375-73-5)            | 98                            | 86                        | 118                       |
| 4:2 FTSA (757124-72-4)     | 93                            | 78                        | 114                       |
| PFHxA (307-24-4)           | 98                            | 86                        | 117                       |
| PFPeS (2706-91-4)          | 98                            | 88                        | 120                       |
| HFPO-DA (13252-13-6)       | 100                           | 83                        | 117                       |
| PFHpA (375-85-9)           | 96                            | 80                        | 116                       |
| PFHxS (355-46-4)           | 98                            | 80                        | 119                       |
| DONA (919005-14-4)         | 101                           | 72                        | 119                       |
| 6:2 FTSA (27619-97-2)      | 92                            | 78                        | 112                       |
| PFOA (335-67-1)            | 98                            | 84                        | 115                       |
| PFHpS (375-92-8)           | 98                            | 87                        | 122                       |
| PFOS (1763-23-1)           | 97                            | 74                        | 118                       |
| PFNA (375-95-1)            | 100                           | 87                        | 123                       |
| 9Cl-PF3ONS (756426-58-1)   | 97                            | 68                        | 119                       |
| 8:2 FTSA (39108-34-4)      | 97                            | 82                        | 127                       |
| PFDA (335-76-2)            | 100                           | 79                        | 121                       |
| PFNS (68259-12-1)          | 96                            | 80                        | 113                       |
| N-MeFOSAA (2355-31-9)      | 99                            | 78                        | 127                       |
| N-EtFOSAA (2991-50-6)      | 96                            | 79                        | 117                       |
| FOSA (754-91-6)            | 98                            | 90                        | 123                       |
| PFUnA (2058-94-8)          | 97                            | 81                        | 121                       |
| PFDS (335-77-3)            | 95                            | 72                        | 122                       |
| 11Cl-PF3OudS (763051-92-9) | 93                            | 73                        | 121                       |
| PFDoA (307-55-1)           | 98                            | 76                        | 126                       |
| PFDoS (79780-39-5)         | 98                            | 76                        | 120                       |
| PFTTrDA (72629-94-8)       | 96                            | 63                        | 137                       |

| Compound Name (CAS No.) | Average (ng L <sup>-1</sup> ) | Min (ng L <sup>-1</sup> ) | Max (ng L <sup>-1</sup> ) |
|-------------------------|-------------------------------|---------------------------|---------------------------|
| N-MeFOSA (31506-32-8)   | 97                            | 78                        | 129                       |
| N-MeFOSE (24448-09-7)   | 102                           | 76                        | 128                       |
| N-EtFOSA (4151-50-2)    | 98                            | 77                        | 113                       |
| N-EtFOSE (1691-99-2)    | 100                           | 70                        | 124                       |
| PFTeDA (376-06-7)       | 98                            | 78                        | 126                       |
| 10:2 FTSA (120226-60-0) | 96                            | 84                        | 117                       |
| PFPrS (423-41-6)        | 89                            | 76                        | 115                       |
| FprPA (356-02-5)        | 96                            | 68                        | 122                       |
| PFBSA (30334-69-1)      | 105                           | 91                        | 128                       |
| FpePA (914637-49-3)     | 97                            | 75                        | 124                       |
| FHUEA (70887-88-6)      | 98                            | 77                        | 114                       |
| PFECBS (133201-07-7)    | 97                            | 84                        | 115                       |
| PFHxSA (41997-13-1)     | 98                            | 87                        | 118                       |
| FhpPA (812-70-4)        | 100                           | 81                        | 121                       |
| FOUEA (70887-84-2)      | 97                            | 82                        | 117                       |
| FDUEA (70887-94-4)      | 98                            | 85                        | 120                       |

**Table S11. Extracted internal standard recoveries, in percent, for the 450 samples. For samples that were injected multiple times due to low recovery in the first injection, only the higher recovery is used. Recoveries were calculated from continuing calibration verification standards.**

| Compound | min | mean | max | Compound     | min | mean | max |
|----------|-----|------|-----|--------------|-----|------|-----|
| PFBA     | 32  | 70   | 100 | FOSA         | 32  | 69   | 97  |
| PFPeA    | 32  | 72   | 104 | PFUnA        | 31  | 65   | 107 |
| PFBS     | 28  | 69   | 98  | PFDS         | 28  | 67   | 94  |
| 4:2 FTSA | 30  | 70   | 130 | 11Cl-PF3OudS | 28  | 67   | 94  |
| PFHxA    | 29  | 71   | 113 | PFDoA        | 17  | 61   | 111 |
| PFPeS    | 29  | 70   | 100 | PFDoS        | 0   | 50   | 97  |
| HFPO-DA  | 33  | 72   | 115 | PFTTrDA      | 17  | 61   | 111 |
| PFHpA    | 31  | 72   | 102 | N-MeFOSA     | 3   | 52   | 83  |



| Compound   | min | mean | max | Compound  | min | mean | max |
|------------|-----|------|-----|-----------|-----|------|-----|
| PFHxS      | 29  | 70   | 100 | N-MeFOSE  | 0   | 54   | 86  |
| DONA       | 31  | 72   | 102 | N-EtFOSA  | 1   | 46   | 73  |
| 6:2 FTSA   | 23  | 71   | 141 | N-EtFOSE  | 1   | 51   | 81  |
| PFOA       | 20  | 72   | 103 | PFTeDA    | 0   | 50   | 97  |
| PFHpS      | 28  | 67   | 94  | 10:2 FTSA | 23  | 62   | 96  |
| PFOS       | 28  | 67   | 94  | PFPrS     | 28  | 69   | 98  |
| PFNA       | 32  | 71   | 104 | FprPA     | 32  | 72   | 104 |
| 9Cl-PF3ONS | 20  | 71   | 103 | PFBSA     | 29  | 70   | 100 |
| 8:2 FTSA   | 32  | 69   | 106 | FpePA     | 29  | 71   | 113 |
| PFDA       | 33  | 68   | 100 | FHUEA     | 35  | 74   | 117 |
| PFNS       | 28  | 67   | 94  | PFECHS    | 29  | 70   | 100 |
| N-MeFOSAA  | 30  | 64   | 95  | PFHxSA    | 28  | 67   | 94  |
| N-EtFOSAA  | 29  | 62   | 90  | FhpPA     | 29  | 71   | 113 |
| FOSA       | 32  | 69   | 97  | FOUEA     | 34  | 72   | 112 |
| PFUnA      | 31  | 65   | 107 | FDUEA     | 30  | 65   | 95  |

#### 1.4 Laboratory analysis of human waste indicators and herbicide metabolites

Laboratory analysis of all compounds other than PFAS was performed at the University of Wisconsin-Stevens Point's Water and Environmental Analysis Lab. Figure S1 displays structures from EPA CompTox<sup>7</sup> of the human waste indicator (HWI) and chloroacetanilide metabolite (CAAM) analytes.

**Acesulfame**

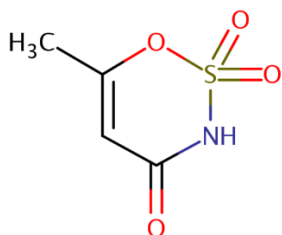

**Carbamazepine**

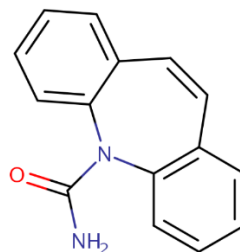

**Sucralose**

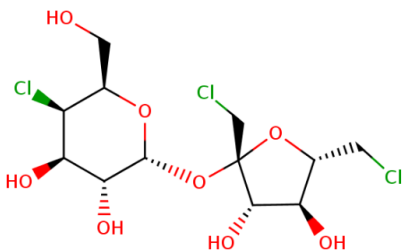

**Sulfamethoxazole**

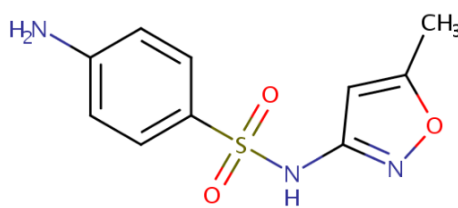

**Alachlor ESA**

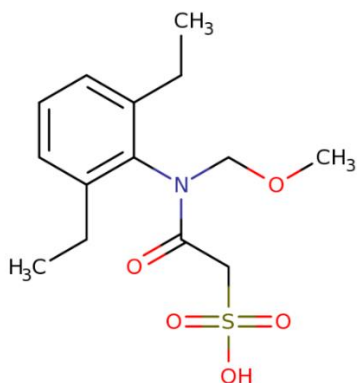

**Alachlor OA**

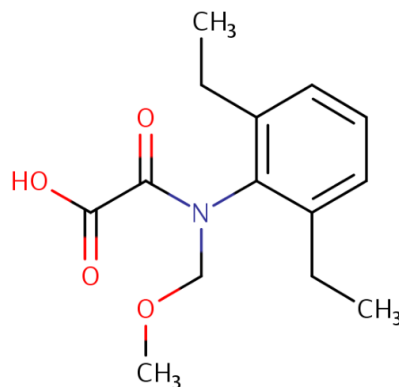

**Metolachlor ESA**

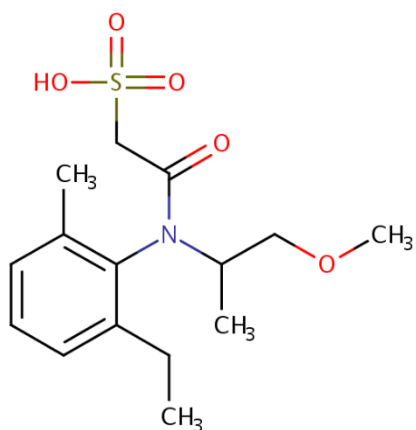

**Metolachlor OA**

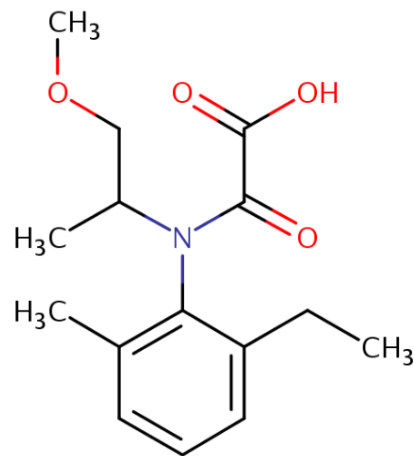

**Figure S1. Structures from EPA CompTox<sup>7</sup> of the human waste indicator (HWI) and chloroacetanilide metabolite (CAAM) analytes.**

### 1.4.1 Purchased chemicals

Methanol (LC/MS Optima Grade CAS 67-56-1), ethyl acetate (Optima Grade CAS 141-78-6), and ethylenediaminetetraacetic acid (EDTA) (Certified ACS CAS 6381-92-6) were purchased from Fisher Scientific. Acetic acid (ACS Reagent 16-19-7) was purchased from Sigma-Aldrich. Sulfuric acid (ACS Grade CAS 7647-01-0) was purchased from VWR. Ultrapure water (18.2 MΩ·cm) was supplied by an Elga water system. Analytical standards and sources are listed in Table S12.

**Table S12. Non-PFAS organic compounds: target analytes, extracted surrogate, and injection internal standards**

| Compound Type                                                                                                                                                                                                                                                                                                               | Method | Compounds           | CAS Number   | Source |
|-----------------------------------------------------------------------------------------------------------------------------------------------------------------------------------------------------------------------------------------------------------------------------------------------------------------------------|--------|---------------------|--------------|--------|
| Analytes                                                                                                                                                                                                                                                                                                                    | HWI    | Acesulfame          | 33665-90-6   | SA     |
|                                                                                                                                                                                                                                                                                                                             |        | Carbamazepine       | 298-46-4     | SA     |
|                                                                                                                                                                                                                                                                                                                             |        | Sucralose           | 56038-13-2   | SA     |
|                                                                                                                                                                                                                                                                                                                             |        | Sulfamethoxazole    | 723-46-6     | SA     |
|                                                                                                                                                                                                                                                                                                                             | CAAM   | Alachlor ESA        | 142363-53-9  | CS     |
|                                                                                                                                                                                                                                                                                                                             |        | Alachlor OA         | 171262-17-2  | CS     |
|                                                                                                                                                                                                                                                                                                                             |        | Metolachlor ESA     | 171118-09-5  | CS     |
|                                                                                                                                                                                                                                                                                                                             |        | Metolachlor OA      | 152019-73-3  | CS     |
| Extracted surrogate                                                                                                                                                                                                                                                                                                         | HWI    | Benzoylgonine-d3    | 115732-68-8  | SA     |
| Injection Internal Standards                                                                                                                                                                                                                                                                                                | HWI    | Acesulfame-D4       | 1623054-53-4 | TRC    |
|                                                                                                                                                                                                                                                                                                                             |        | Carbamazepine-D10   | 132183-78-9  | SA     |
|                                                                                                                                                                                                                                                                                                                             |        | Sucralose-D6        | 1459161-55-7 | TRC    |
|                                                                                                                                                                                                                                                                                                                             |        | Sulfamethoxazole-D4 | 1020719-86-1 | TRC    |
|                                                                                                                                                                                                                                                                                                                             | CAAM   | Butachlor ESA       | 1173022-75-7 | CS     |
| <p>HWI = Human waste indicators (pharmaceuticals, personal care products, artificial sweeteners)<br/>           CAAM = Chloroacetanilide metabolites; ESA = ethane sulfonic acid; OA = oxanilic acid<br/>           Source column abbreviations: TRC = Toronto Research Chemicals; SA = Sigma Aldrich; CS = ChemService</p> |        |                     |              |        |

#### 1.4.2 Aqueous extraction method for human waste indicators

A 450 mL aliquot of sample was treated with 50 mL of EDTA (80 g L<sup>-1</sup>), 300 µL sulfuric acid (1:1), and 125 µL benzoylecgonine-d3 (surrogate standard). Of this mixture, 100 mL was passed through a hydrophilic-lipophilic balanced cartridge (Waters Oasis HLB 6 cc, 200 mg) using a Dionex Autotrace solid-phase extraction (SPE) unit. Prior to loading the sample, cartridges were conditioned with 5.0 mL of methanol then 5.0 mL ultra-pure water at 5.0 mL min<sup>-1</sup>. After loading, cartridges were dried for 15 minutes under nitrogen gas then eluted with 5.0 mL methanol at 5.0 mL min<sup>-1</sup>. Eluents were transferred to a Turbovap concentration station and dried with nitrogen gas at 50°C. After drying completely, 500 µL of methanol was used to rinse down the sides of the tubes, then extracts were brought to dryness again. Tubes were removed from the Turbovap and 50 µL of injection internal standard mix was added. This final extract was brought to a volume of 500 µL with 15 mM acetic acid in ultra-pure water and transferred to vials for analysis by LC/MS.

#### 1.4.3 Aqueous extraction method for chloroacetanilide metabolites

This method is based upon USGS Open File Report 00-182<sup>8</sup>. A Dionex Autotrace Solid Phase Extraction (SPE) system fitted with a C18 cartridge (Waters SepPak C18 6cc, 500 mg). Cartridges were conditioned with 3 mL of each: methanol, ethyl acetate, methanol again, then ultra-pure water. After conditioning, the syringe was rinsed with 5 mL ethyl acetate, then 125 mL of sample was loaded. The cartridge was dried with nitrogen for 0.5 minutes, then eluted with ethyl acetate to remove the more non-polar compounds, followed by methanol to remove the more polar chloroacetanilide herbicide metabolites. Both fractions were collected in 5 mL centrifuge tubes. The ethyl acetate fraction was discarded. The methanol fraction was transferred to a Turbovap concentration station and dried with nitrogen gas at 50°C. After drying completely, 500 µL of methanol was used to rinse down the sides of the tubes, then extracts were brought to dryness again. Tubes were removed from the Turbovap and 50 µL of Butachlor ESA injection internal standard mix was added. This final extract was brought to a volume of 500 µL with 15 mM acetic acid in ultra-pure water and transferred to vials for analysis by LC/MS.

#### 1.4.4 LC/MS/MS method for human waste indicators

Analysis was performed on an Agilent 1200 series high performance liquid chromatograph coupled to an Agilent 6430 triple quadrupole mass spectrometer with an electrospray ionization source (ESI-LC/MS/MS) following a pre-programmed gradient (below) with an additional two minutes of post run time. The injection internal standard recovery was used to adjust target analyte concentrations.

Analytical column: Zorbax Eclipse XDB-C18 column, 4.6 × 50 mm; 1.8 µ (Scheurer et. al., 2009)

Guard column: Zorbax Eclipse Plus-C18, 2.1 x 12.5 mm; 5  $\mu$

Injection volume: 20  $\mu$ L

Flow Rate: 0.5 mL minute<sup>-1</sup>

Mobile phase: (A) 15 mM acetic acid in ultra-pure water; (B) 15 mM acetic acid in methanol

Column temperature: 50°C

| Gradient: | Time (minutes) | % mobile phase B |
|-----------|----------------|------------------|
|           | 0              | 10               |
|           | 5.0            | 45               |
|           | 6.5            | 95               |
|           | 15.0           | 95               |
|           | 16.0           | 10               |

#### 1.4.5 LC/MS/MS method for chloroacetanilide metabolites

Analysis was performed on an Agilent 1200 series high performance liquid chromatograph coupled to an Agilent 6430 triple quadrupole mass spectrometer with an electrospray ionization source (ESI-LC/MS/MS) following a pre-programmed gradient (below) with an additional two minutes of post run time. The injection internal standard recovery was used to adjust target analyte concentrations.

Analytical column: Thermo Betasil C-18, 150 x 2.1 mm; 3  $\mu$

Injection volume: 10  $\mu$ L

Flow Rate: 0.5 mL minute<sup>-1</sup>

Mobile phase: (A) 15 mM acetic acid in ultra-pure water; (B) 15 mM acetic acid in methanol

Column temperature: 70°C

| Gradient: | Time (minutes) | % mobile phase B |
|-----------|----------------|------------------|
|           | 0              | 20               |
|           | 10.0           | 85               |
|           | 20.0           | 85               |
|           | 22.0           | 20               |

#### 1.4.6 Quality control – non-PFAS organics

Ongoing quality control included analysis of laboratory reagent blanks (ultra-pure water extracted by SPE – for pharmaceuticals, personal products, and artificial sweeteners, the blank was prepared in the same

manner as samples, with the addition of EDTA, sulfuric acid, and surrogate standard). Laboratory fortified blanks (ultra-pure water) and laboratory matrix spikes (study samples) were prepared similar to samples, with the addition of a target analyte mixture. Laboratory reagent blanks, fortified blanks, and matrix spikes were performed for every 20 samples. Field duplicates and blanks were also collected and analyzed. Internal calibration was utilized. Calibration checks and blanks were performed every 10 samples.

### 1.5 Inorganics and total organic carbon

Inorganics analysis was conducted at WEAL. The elemental forms of major cations, metals, sulfur and phosphorous were analyzed using EPA Method 200.7, rev. 4.4. The elements analyzed were As, Ca, Cu, Fe, K, Pb, Mg, Mn, Na, P, S and Zn. Total ammonia/ammonium nitrogen (NH<sub>x</sub>), nitrate-nitrogen plus nitrite nitrogen (NO<sub>x</sub>) and chloride were analyzed using *Standard Methods*<sup>9</sup> 4500-NH<sub>3</sub> H, 4500-NO<sub>3</sub> F and 4500-Cl G, respectively. Laboratory pH, conductivity and alkalinity were analyzed following *Standard Methods*<sup>9</sup> 4500H+ B, 2510B and 2320B. Non-purgeable total organic carbon (TOC) was analyzed following *Standard Methods* 5310B-2000 TOC<sup>9</sup>. TOC was chosen, rather than dissolved organic carbon (i.e., TOC of filtered samples), because of the possibility of colloidal or particulate organic matter (which could transport PFAS) content in karst and fractured rock groundwater environments. Standards and reagents are shown in Table S13 and Table S14.

**Table S13. Standards and reagents for inorganics analyzed with ICP-OES, alkalinity and total organic carbon**

| Parameter(s)                                                                              | Standards                                                                 | Reagents                                                                                                                                                                                                                                                                    |
|-------------------------------------------------------------------------------------------|---------------------------------------------------------------------------|-----------------------------------------------------------------------------------------------------------------------------------------------------------------------------------------------------------------------------------------------------------------------------|
| Arsenic, calcium, iron, magnesium, manganese, phosphorus, potassium, sodium, sulfur, zinc | Inorganic Ventures: Multi-element custom grade solution in 5% nitric acid | Fisher Chemical: Nitric acid, Optima grade. Nitric acid, Trace metal grade.<br><br>Reagent water: ASTM Type I, 18.2 MΩ<br><br>Inorganic Ventures: Single element standards. Yttrium (internal standard), Cerium (interference correction), Cobalt (interference correction) |

| Parameter(s)                                           | Standards                                                                                                                                                                                                                                                                                                               | Reagents                                                                                                                               |
|--------------------------------------------------------|-------------------------------------------------------------------------------------------------------------------------------------------------------------------------------------------------------------------------------------------------------------------------------------------------------------------------|----------------------------------------------------------------------------------------------------------------------------------------|
|                                                        |                                                                                                                                                                                                                                                                                                                         | Alfa Aesar: Cesium nitrate, metals basis 99.99% purity                                                                                 |
| Alkalinity (as CaCO <sub>3</sub> ), pH, & conductivity | Fisher Scientific: Sodium bicarbonate, NaHCO <sub>3</sub> , anhydrous, Certified ACS.<br>Potassium chloride, Certified ACS grade.<br><br>LabChem: Buffer solutions, pH 4.0, 7.0, and 10.0.                                                                                                                              | Fisher Chemical: Sulfuric acid, 95-98%, ACS grade. Potassium chloride, Certified ACS grade.<br><br>Reagent water: ASTM Type I, 18.2 MΩ |
| Total organic carbon                                   | Acros Organics: Potassium hydrogen phthalate, C <sub>8</sub> H <sub>5</sub> KO <sub>4</sub> , Primary grade standard<br><br>Fisher Scientific: Sodium bicarbonate, NaHCO <sub>3</sub> , anhydrous, Certified ACS<br><br>Fisher Scientific: Sodium carbonate, Na <sub>2</sub> CO <sub>3</sub> , anhydrous, Certified ACS | Fisher Chemical: Sulfuric acid, Trace metal grade. Phosphoric acid, 85%, Certified ACS<br><br>Reagent water: ASTM Type I, 18.2 MΩ      |

**Table S14. Reagents (R) and standards (Std) for nitrate plus nitrite, chloride and ammonium**

| Analyte                                                         | Chemical                                                        | CAS        | Source | Grade  | Reagent/Std |
|-----------------------------------------------------------------|-----------------------------------------------------------------|------------|--------|--------|-------------|
| NO <sub>3</sub> <sup>-</sup> + NO <sub>2</sub> <sup>-</sup> (N) | Ammonium chloride                                               | 12125-02-9 | Sigma  | 99.5%  | R           |
| NO <sub>3</sub> <sup>-</sup> + NO <sub>2</sub> <sup>-</sup> (N) | Ethylenediamine tetraacetic acid disodium salt dihydrate (EDTA) | 6381-92-6  | Fisher | ACS    | R           |
| NO <sub>3</sub> <sup>-</sup> + NO <sub>2</sub> <sup>-</sup> (N) | Sodium hydroxide                                                | 1310-73-2  | Fisher | ACS    | R           |
| NO <sub>3</sub> <sup>-</sup> + NO <sub>2</sub> <sup>-</sup> (N) | Sulfanilamide                                                   | 63-74-1    | Sigma  | >98.0% | R           |

| Analyte                                                         | Chemical                                                    | CAS       | Source | Grade  | Reagent/Std |
|-----------------------------------------------------------------|-------------------------------------------------------------|-----------|--------|--------|-------------|
| NO <sub>3</sub> <sup>-</sup> + NO <sub>2</sub> <sup>-</sup> (N) | N-(1-Naphthyl)<br>ethylenediamine,<br>dihydrochloride (NED) | 1465-25-4 | Acros  | 98.0+% | R           |
| NO <sub>3</sub> <sup>-</sup> + NO <sub>2</sub> <sup>-</sup> (N) | 85% phosphoric acid                                         | 7664-38-2 | Fisher | ACS    | R           |
| NO <sub>3</sub> <sup>-</sup> + NO <sub>2</sub> <sup>-</sup> (N) | Sodium nitrite                                              | 7632-00-0 | Fisher | ACS    | Std         |
| NO <sub>3</sub> <sup>-</sup> + NO <sub>2</sub> <sup>-</sup> (N) | Potassium nitrate                                           | 7757-79-1 | Sigma  | 99.0%  | Std         |

| Analyte  | Chemical                          | CAS       | Source | Grade        | Reagent/Std |
|----------|-----------------------------------|-----------|--------|--------------|-------------|
| Chloride | Mercuric thiocyanate              | 592-85-8  | Sigma  | 96.5%-103.5% | R           |
| Chloride | Methanol                          | 67-56-1   | Fisher | ACS          | R           |
| Chloride | Iron (III) nitrate<br>nonahydrate | 7782-61-8 | Sigma  | >98.0%       | R           |
| Chloride | Nitric acid                       | 7697-37-2 | Fisher | ACS+         | R           |
| Chloride | Sodium chloride                   | 7647-14-5 | Fisher | ACS          | Std         |

| Analyte                               | Chemical                                                              | CAS        | Source | Grade | Reagent/Std |
|---------------------------------------|-----------------------------------------------------------------------|------------|--------|-------|-------------|
| NH <sub>4</sub> as NH <sub>3</sub> -N | Ammonium chloride                                                     | 12125-02-9 | Sigma  | 99.5% | Std         |
| NH <sub>4</sub> as NH <sub>3</sub> -N | Crystalline phenol                                                    | 108-95-2   | Sigma  | ACS   | R           |
| NH <sub>4</sub> as NH <sub>3</sub> -N | Sodium hydroxide                                                      | 1310-73-2  | Fisher | ACS   | R           |
| NH <sub>4</sub> as NH <sub>3</sub> -N | 8.25% Bleach (Sodium<br>hypochlorite)                                 |            | Clorox |       | R           |
| NH <sub>4</sub> as NH <sub>3</sub> -N | Ethylenediamine tetraacetic<br>acid disodium salt dihydrate<br>(EDTA) | 6381-92-6  | Fisher | ACS   | R           |
| NH <sub>4</sub> as NH <sub>3</sub> -N | Sodium Nitroferricyanide                                              | 13755-38-9 | Fisher | ACS   | R           |
| NH <sub>4</sub> as NH <sub>3</sub> -N | Sulfuric acid                                                         | 7664-93-9  | Fisher | TMG   | R           |

The elemental forms of major cations, metals, sulfur and phosphorous were analyzed using an Agilent Technologies 700 Series inductively coupled plasma optical emission spectrometer by EPA Method 200.7,



rev. 4.4. Total ammonia/ammonium nitrogen (NH<sub>x</sub>), nitrate-nitrogen plus nitrite nitrogen (NO<sub>x</sub>) and chloride were analyzed using a Lachat 8500 flow-injected autoanalyzer by Standard Methods<sup>9</sup> 4500-NH<sub>3</sub> H, 4500-NO<sub>3</sub> F and 4500-Cl G, respectively. Laboratory pH, conductivity and alkalinity were analyzed using a Mantech AutoMax 73 auto-titration system following Standard Methods 4500H+ B, 2510B and 2320B. Non-purgeable TOC was analyzed by combustion using a Shimadzu TOC Analyzer following Standard Methods 5310B-2000 TOC.

MDLs for all non-PFAS compounds/parameters are shown in Table S15.

**Table S15. Method detection limits (MDLs) for non-PFAS parameters**

| Parameter(s)                       | Method detection limit (µg L <sup>-1</sup> ) |
|------------------------------------|----------------------------------------------|
| CAAMs (all four analytes)          | 0.08                                         |
| Acesulfame                         | 0.005                                        |
| Sucralose                          | 0.025                                        |
| Carbamazepine                      | 0.002                                        |
| Sulfamethoxazole                   | 0.005                                        |
| Arsenic                            | 4                                            |
| Calcium                            | 51                                           |
| Iron                               | 13                                           |
| Magnesium                          | 4                                            |
| Manganese                          | 1                                            |
| Phosphorus                         | 11                                           |
| Potassium                          | 16                                           |
| Sodium                             | 246                                          |
| Sulfur                             | 190                                          |
| Zinc                               | 1                                            |
| Chloride                           | 500                                          |
| Ammonia/ammonium (as N)            | 10                                           |
| Nitrate plus nitrite (as N)        | 100                                          |
| Alkalinity (as CaCO <sub>3</sub> ) | 400                                          |
| Total organic carbon               | 300                                          |

## 1.6 Land use data analysis

The Wiscland2<sup>10</sup> spatial dataset was used for land use analysis. Table S16 provides land use definitions, precision and accuracy from the User Guide. The Wiscland2 user guide<sup>10</sup> can be accessed, starting from the web page <https://dnr.wisconsin.gov/maps/WISCLAND>, by clicking the link to the GIS Open Data Portal (currently accessible at <https://data-wi-dnr.opendata.arcgis.com/>) and then searching for “Wiscland2” in the search box.

**Table S16. Wiscland2<sup>10</sup> definitions of land use types used in this study**

| Land use category | Definition# from Wiscland2 User Guide                                                                                                                                                                                                                                                                                                                                                  | Additional notes                                                                                                                                                                                                               | Precision* | Accuracy* |
|-------------------|----------------------------------------------------------------------------------------------------------------------------------------------------------------------------------------------------------------------------------------------------------------------------------------------------------------------------------------------------------------------------------------|--------------------------------------------------------------------------------------------------------------------------------------------------------------------------------------------------------------------------------|------------|-----------|
| Developed         | Structures and areas associated with intensive human activity and land use. Note: Areas meeting the requirements of both Urban/Developed and Forest, Wetland, or Grassland classes should be classified in the Urban/Developed category (e.g., residential areas with 75% crown closure of trees but 25% impervious cover would be classified as Urban/Developed, rather than Forest). | Since most Wisconsin cities have municipal water supplies, private wells are not typically found in “urban” areas. Study wells in this land use category predominantly came from areas that are best described as “developed”. | 91%        | 0.99      |
| Agricultural      | Land under cultivation for food or fiber.                                                                                                                                                                                                                                                                                                                                              | Includes the following categories: Cash Grain, Continuous Corn, Dairy Rotation, and Potato/Vegetable.                                                                                                                          | NA         | NA        |
| Grassland         | Lands covered by non-cultivated herbaceous vegetation predominated by perennial grasses. Forbs and other grass-like plants                                                                                                                                                                                                                                                             | Includes land used for livestock forage production and grazing.                                                                                                                                                                | 84%        | 0.95      |

| Land use category | Definition# from Wiscland2 User Guide                                                                                                                                                                                                                                                               | Additional notes | Precision* | Accuracy* |
|-------------------|-----------------------------------------------------------------------------------------------------------------------------------------------------------------------------------------------------------------------------------------------------------------------------------------------------|------------------|------------|-----------|
|                   | may be present or sometimes even dominant.                                                                                                                                                                                                                                                          |                  |            |           |
| Forested          | An upland area of land covered with woody perennial plants, the trees reaching a mature height of at least 6 feet tall with definite crown (closure of at least 10%).<br><br>Note: If an area meets the requirements of Forested Wetland, it should take precedence over any other Forest Category. |                  | 78%        | 0.96      |

Notes:

#From Appendix C of the Wiscland2 User Guide<sup>10</sup>

\*From Table 2 of the Wiscland2 User Guide<sup>10</sup>

NA: Not available

## 2.0 Results and discussion

### 2.1 Occurrence

Figure S2 displays boxplots of PFAS concentrations with a minimum comparison level of 0.18 ng/L and includes modeled concentrations of three compounds (PFBA, PFDoA and PFBS) above that minimum comparison level but below their respective detection limits (0.327, 0.256 and 0.219 ng/L, respectively). Concentrations were modeled using regression on order statistics<sup>11,12</sup>. Figure S3 shows plots of those regression models and the detected and modeled concentrations of PFBA, PFDoA and PFBS.

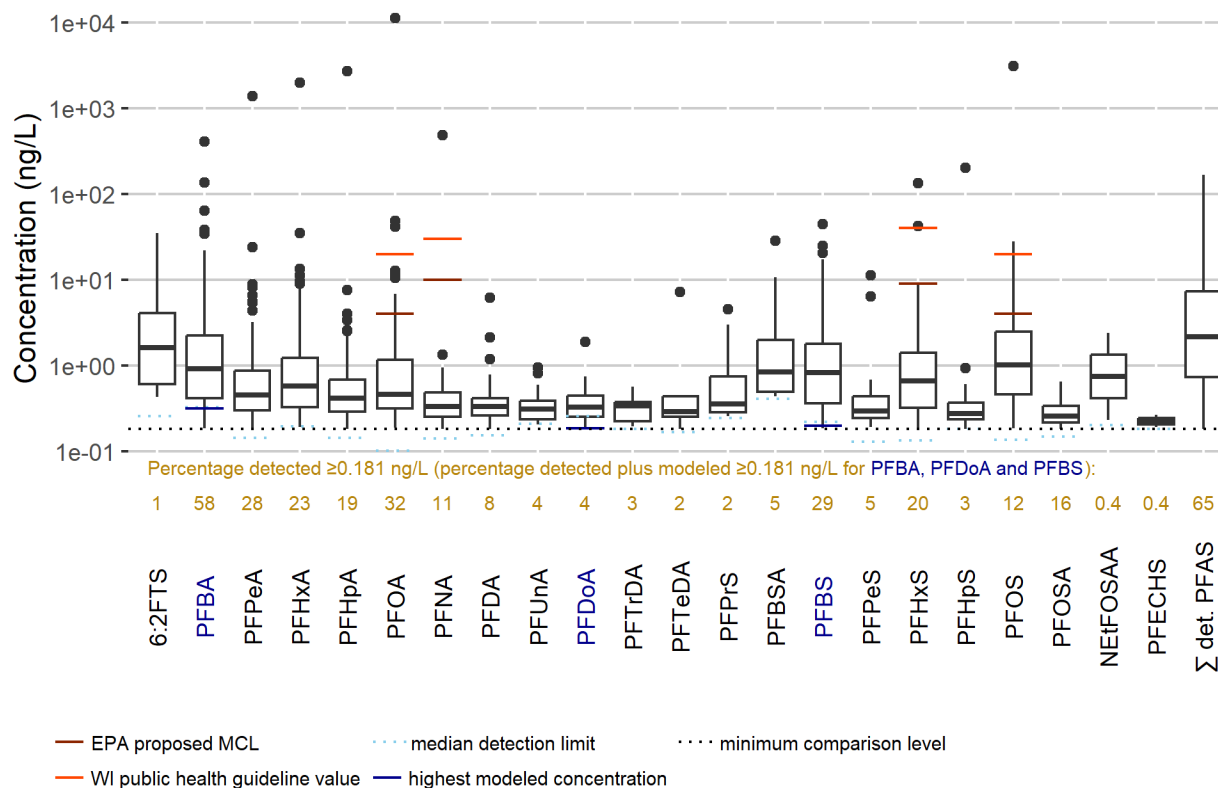

**Figure S2. Boxplots of detected and modeled PFAS concentrations at or above 0.181 ng/L**

The following compounds were analyzed but not detected in any of the 450 samples (CAS number for each compound provided in parentheses):

- The perfluoroalkyl sulfonic acids PFNS (68259-12-1), PFDS (335-77-3) and PFDoS (79780-39-5)
- The PFHxS precursor PFHxSA (41997-13-1) and the PFOS precursors NMeFOSA (31506-32-8), NMeFOSE (24448-09-7), NMeFOSAA (2355-31-9), NETFOSA (4151-50-2) and NETFOSE (1691-99-2)
- The fluorotelomer sulfonic acids 4:2FTS (757124-72-4), 8:2FTS (39108-34-4) and 10:2FTS (120226-60-0)
- The fluorotelomer carboxylic acids 3:3FTCA (356-02-5), 5:3FTCA (914637-49-3) and 7:3FTCA (812-70-4)
- The fluorotelomer unsaturated carboxylic acids 6:2FTUCA (70887-86-6), 8:2FTUCA (70887-84-2) and 10:2FTUCA (70887-94-4)
- The ether-containing fluorosubstances HFPO-DA (13252-13-6), DONA (919005-14-4), 9Cl-PF3ONS (756426-58-1) and 11Cl-PF3OUdS (763051-92-9)

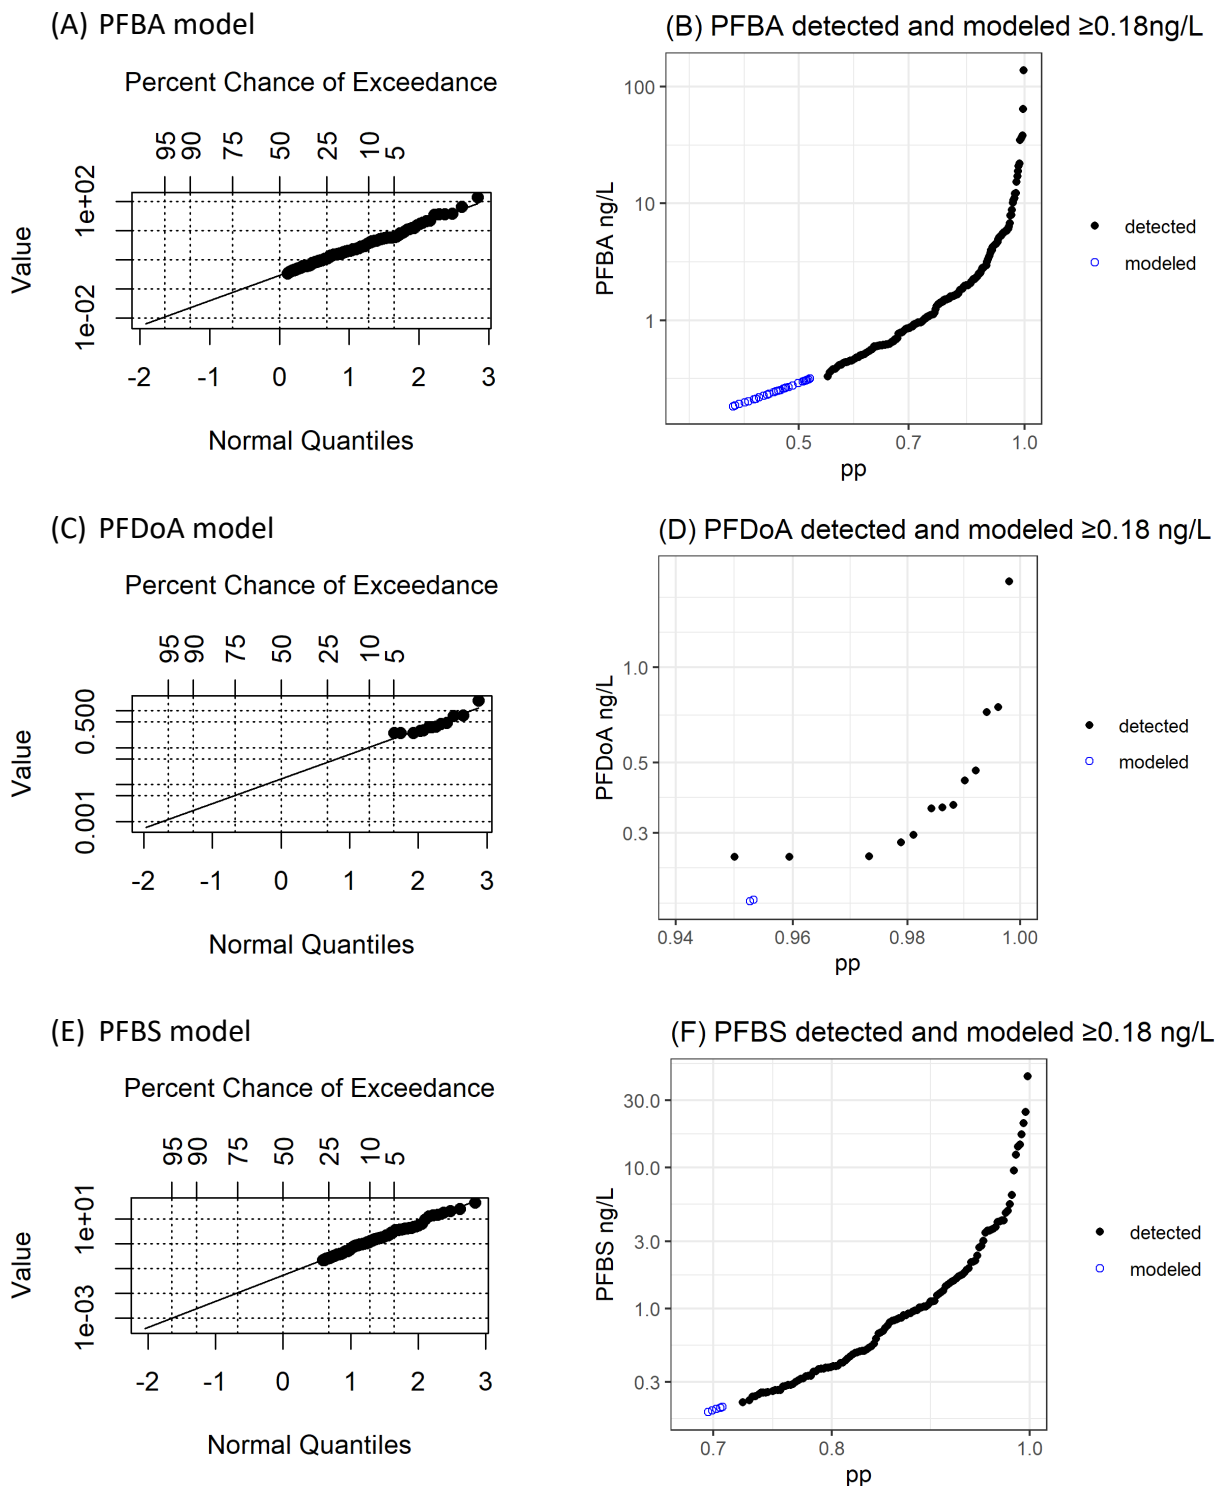

**Figure S3. Regression on order statistics models for the three compounds with modeled concentrations above 0.181 ng/L. In A, C and E, lines (the regression model, note non-uniform x-axis) are fit to the observed data (points). B, D and F show the observed data (black points) and modeled concentrations (blue open circles)  $\geq 0.181$  ng/L.**

Concentrations of non-PFAS lab parameters for the 450 samples are shown in Figure 4. For detection limits, see Table S15. Values of field parameters are shown in Figure S5.

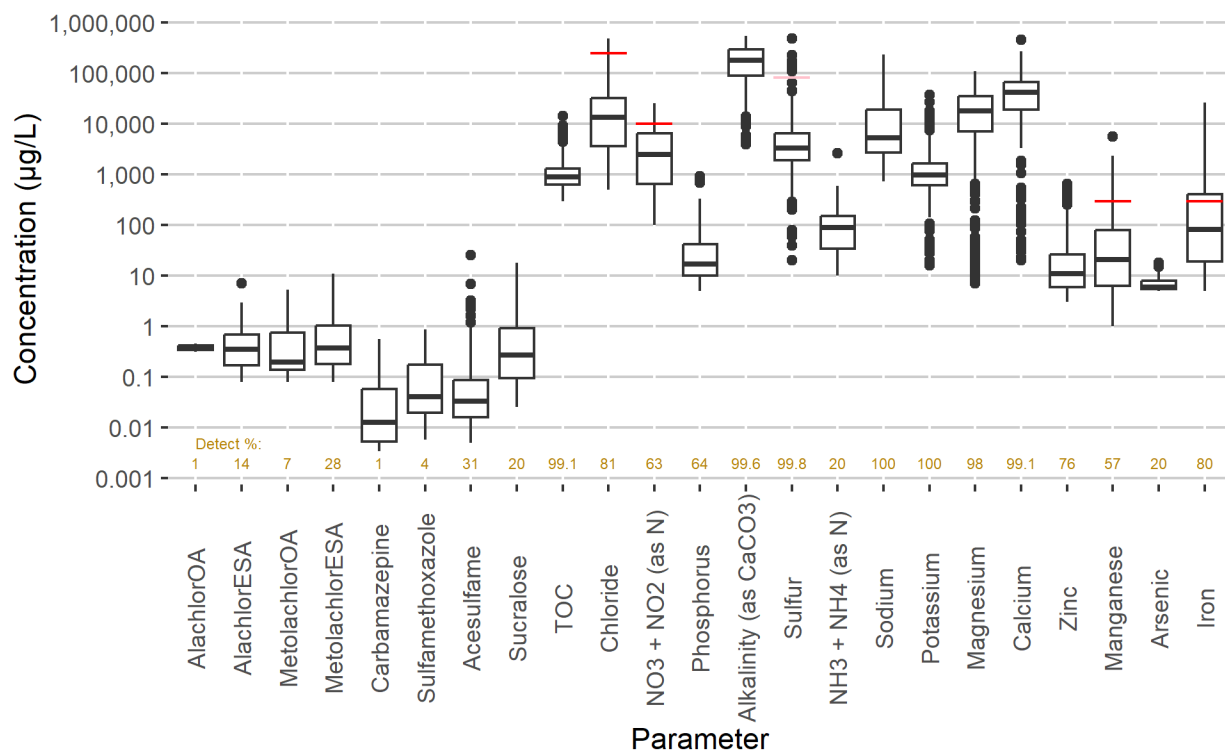

**Figure S4. Prevalence of non-PFAS analytes/parameters in the 450 samples. Red lines indicate Wisconsin groundwater standards for compounds/parameters with one or more samples above. The pink line (sulfur) is the corresponding concentration of S, under the assumption that all S is sulfate, to the public welfare groundwater standard for sulfate.**

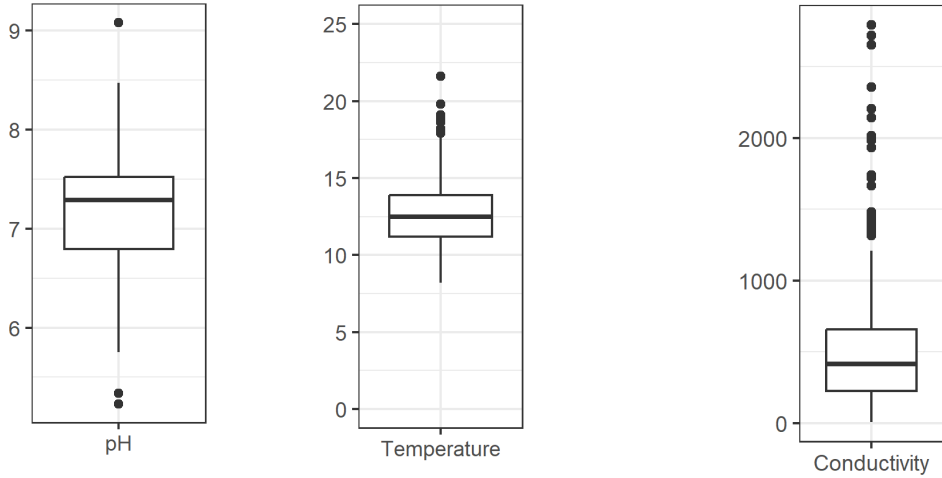

**Figure S5. Field measurement values of water pH, temperature (°C) and conductivity (µS/cm) in the 450 samples.**

**2.2 Source tracing**

A subset of project groundwater samples (collected from residences with private wells) with all PFAS detected at or below Wisconsin precipitation levels is shown in Figure S6. Wisconsin precipitation levels are considered to be the highest site median, per compound, from Table 2 of Pfothenauer et al.<sup>13</sup>

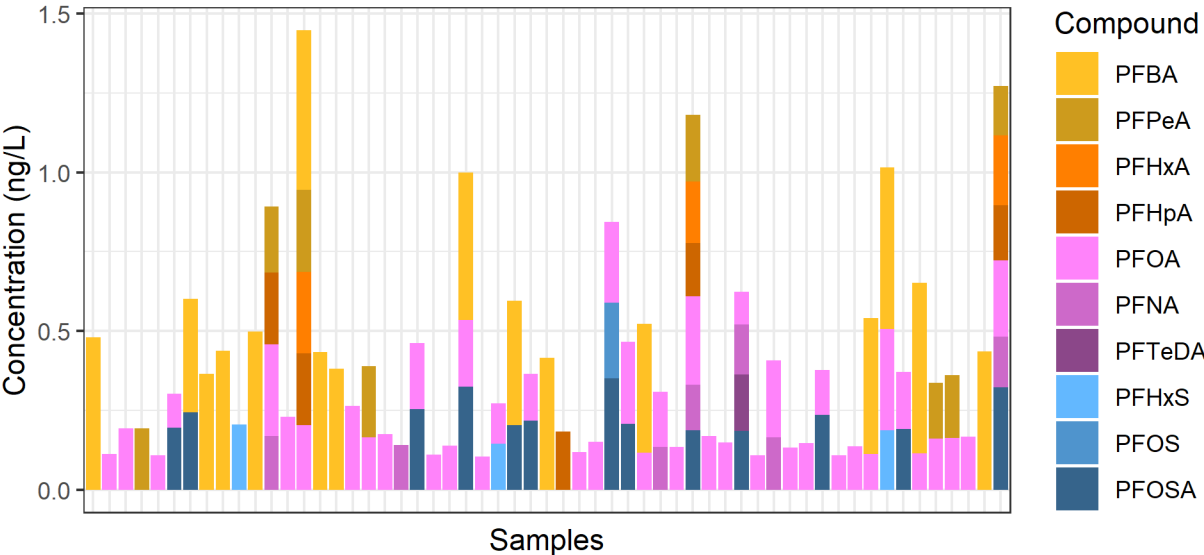

**Figure S6. Project samples (n=57) with all detected PFAS below 2020 Wisconsin precipitation levels, considered to be the highest site median in Table 2 of Pfothenauer et al.<sup>13</sup>**

In Tables S17 and S18, proportionality testing of detection(s) of one or more PFAS by land use type is compared using two different choices for dealing with censored data. Choice A (used in the manuscript) is to count all detections, without any adjustment to the laboratory reported values. Choice B is to count a result as a detection only if the detected concentration was  $\geq 0.409$  ng/L (the highest LOD for all 22 PFAS detected in the study).

**Table S17. Comparison of proportionality using either (A) detection(s) at any level or (B) detection(s)  $\geq 0.409$  ng/L**

| Land use type | Number of samples | (A) Detection(s) at any concentration | (B) Detection(s) $\geq 0.409$ ng/L only | (A) Detection rate at any concentration | (B) Detection rate $\geq 0.409$ ng/L |
|---------------|-------------------|---------------------------------------|-----------------------------------------|-----------------------------------------|--------------------------------------|
| Forested      | 246               | 173                                   | 122                                     | 70%                                     | 51%                                  |
| Agricultural  | 110               | 71                                    | 58                                      | 65%                                     | 54%                                  |
| Grassland     | 49                | 34                                    | 25                                      | 69%                                     | 53%                                  |
| Developed     | 45                | 40                                    | 36                                      | 89%                                     | 87%                                  |

**Table S18. Proportionality test outcomes using (A) detection(s) at any level or (B) detection(s)  $\geq 0.409$  ng/L**

| Comparison                    | (A) p-value for detection(s) at any concentration | (B) p-value for detection(s) $\geq 0.409$ only |
|-------------------------------|---------------------------------------------------|------------------------------------------------|
| Agricultural versus forested  | 0.34                                              | 0.76                                           |
| Agricultural versus grassland | 0.68                                              | 1                                              |
| Agricultural versus developed | <b>0.004</b>                                      | <b>0.0002</b>                                  |
| Forested versus grassland     | 0.16                                              | 0.94                                           |
| Forested versus developed     | <b>0.02</b>                                       | <b>0.00002</b>                                 |
| Grassland versus developed    | <b>0.04</b>                                       | <b>0.001</b>                                   |

Figure S7 shows the rate of detection of individual PFAS, at any concentration, for different land use categories. Proportionality test (R function 'prop.test') p-values less than 0.05 (bolded in Table S19) indicate which comparisons have significant differences in detection rate. Differences in PFOA



concentrations in the agricultural to developed comparison are moderately significant, with a p-value of 0.056.

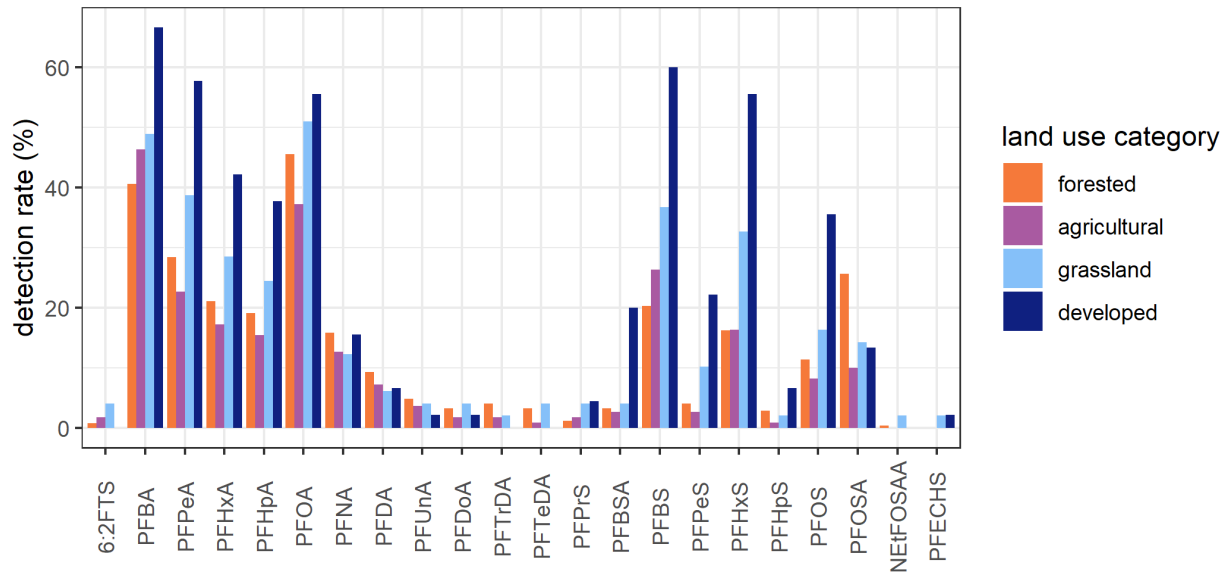

Figure S7. Rate of detection of individual PFAS, at any concentration, across land use categories.

**Table S19. Significance (p-values) of detection rates across land use categories. P-values < 0.05 indicate comparisons where the detection rate is significantly different between the two categories (for which is higher, see Figure S4).**

|         | forested to agricultural | forested to grassland | forested to developed | agricultural to grassland | agricultural to developed | grassland to developed |
|---------|--------------------------|-----------------------|-----------------------|---------------------------|---------------------------|------------------------|
| PFBA    | 0.38                     | 0.36                  | <b>0.002</b>          | 0.89                      | <b>0.03</b>               | 0.13                   |
| PFPeA   | 0.31                     | 0.21                  | <b>0.0002</b>         | 0.06                      | <b>0.00006</b>            | 0.1                    |
| PFHxA   | 0.48                     | 0.34                  | <b>0.004</b>          | 0.16                      | <b>0.002</b>              | 0.24                   |
| PFHpA   | 0.5                      | 0.51                  | <b>0.01</b>           | 0.25                      | <b>0.005</b>              | 0.24                   |
| PFOA    | 0.18                     | 0.58                  | 0.28                  | 0.15                      | 0.056                     | 0.81                   |
| PFNA    | 0.54                     | 0.67                  | 1                     | 1                         | 0.83                      | 0.87                   |
| PFDA    | 0.66                     | 0.65                  | 0.77                  | 1                         | 1                         | 1                      |
| PUnA    | 0.81                     | 1                     | 0.69                  | 1                         | 1                         | 1                      |
| PFDoA   | 0.68                     | 1                     | 1                     | 0.77                      | 1                         | 1                      |
| PFTTrDA | 0.44                     | 0.79                  | 0.35                  | 1                         | 0.9                       | 1                      |
| PFTeDA  | 0.35                     | 1                     | 0.46                  | 0.47                      | 1                         | 0.51                   |
| PFPPrS  | 1                        | 0.41                  | 0.36                  | 0.77                      | 0.71                      | 1                      |
| PFBSA   | 1                        | 1                     | <b>0.00005</b>        | 1                         | <b>0.0009</b>             | <b>0.04</b>            |
| PFBS    | 0.26                     | <b>0.02</b>           | <b>0.00000008</b>     | 0.26                      | <b>0.0002</b>             | <b>0.04</b>            |
| PFPeS   | 0.75                     | 0.15                  | <b>0.00004</b>        | 0.11                      | <b>0.0003</b>             | 0.19                   |
| PFHxS   | 1                        | <b>0.01</b>           | <b>0.00000002</b>     | <b>0.04</b>               | <b>0.000002</b>           | <b>0.04</b>            |
| PFHpS   | 0.45                     | 1                     | 0.4                   | 1                         | 0.14                      | 0.55                   |
| PFOS    | 0.47                     | 0.47                  | <b>0.00008</b>        | 0.21                      | <b>0.00007</b>            | 0.058                  |
| PFOSA   | <b>0.001</b>             | 0.13                  | 0.11                  | 0.61                      | 0.75                      | 1                      |

An expanded version of Figure 4 of the manuscript (Spearman correlations), showing additional study variables, is shown as Figure S8.

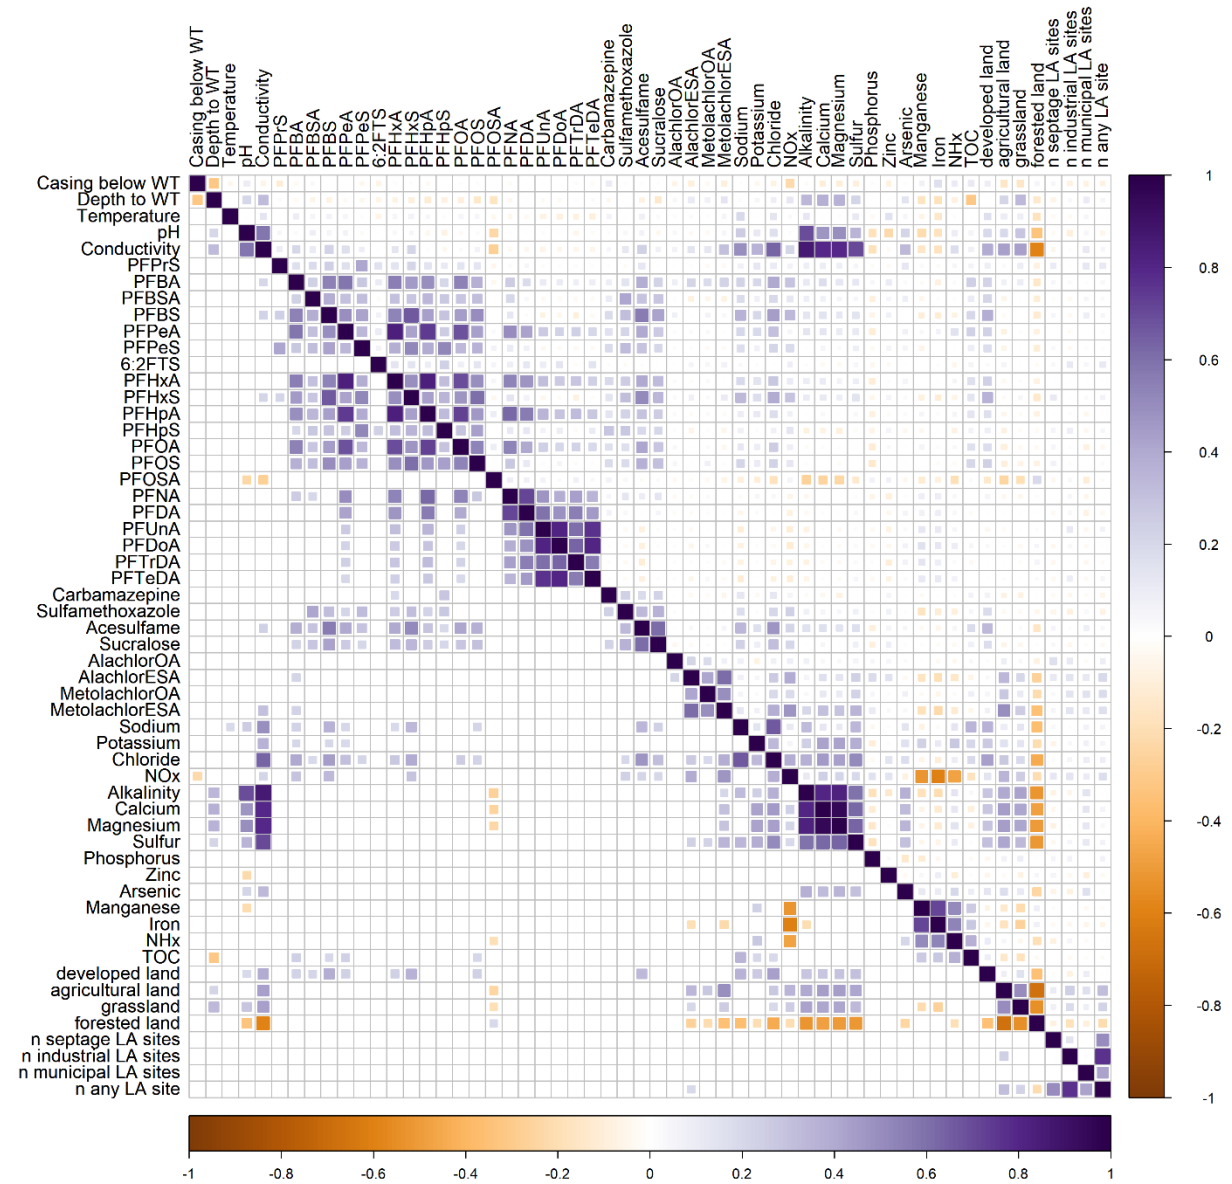

Figure S8. Correlation plot with intensity and amount of color indicating the value of the Spearman correlation coefficient ( $\rho$ ) between two variables. The upper-right triangle shows all correlation values while the lower-left triangle shows colored squares only for significant correlations (Holm sequentially adjusted  $p < 0.05$ ).

Figure S9 displays concentrations of PFBA, which are higher in a portion of western Wisconsin compared to the rest of the state (Mann-Whitney-Wilcoxon rank sum test  $p = 8 \times 10^{-12}$ ).

The single highest PFBA concentration (largest diameter circle on Figure S9, not located in the yellow-shaded portion of western Wisconsin) occurred at the same site as the PFOA concentration of 11,300 ng/L (an unconsolidated aquifer in north-central Wisconsin). In the vicinity of that original sampling site, water from additional homes with private wells has been sampled for PFAS as part of a separate effort from this study. Sampling efforts in the area are ongoing and information is available at <https://dnr.wisconsin.gov/topic/PFAS/Stella.html>. That web page is currently planned to be updated as additional information emerges.

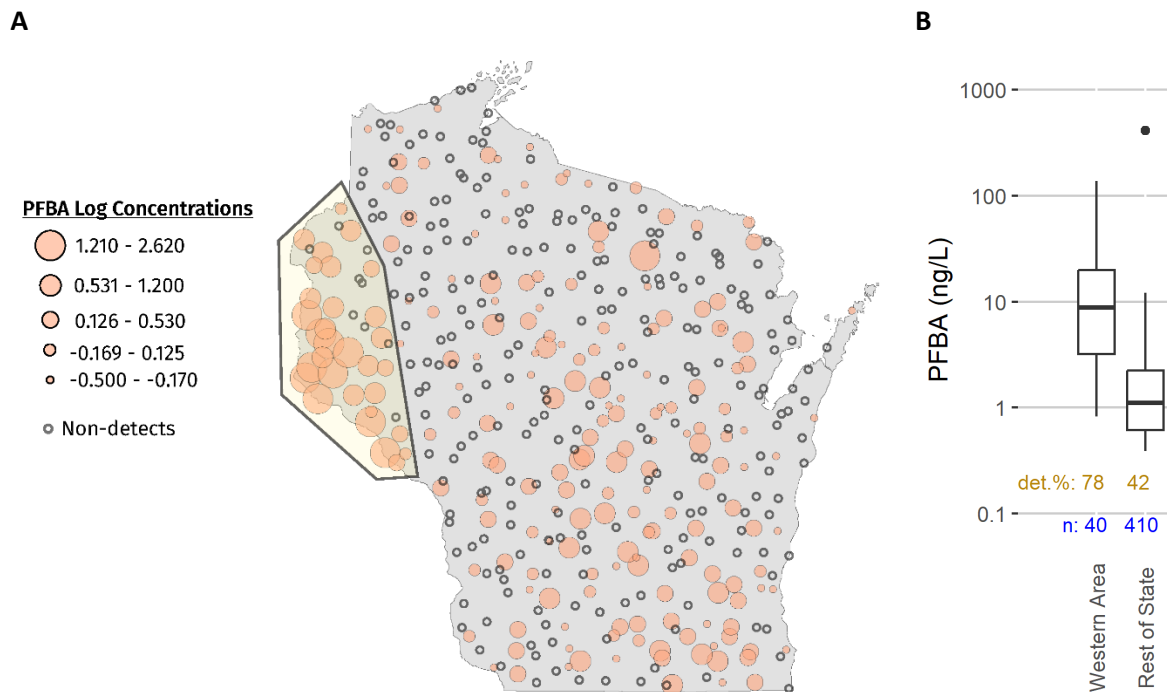

**Figure S9. A) Log of concentrations (ng/L) of PFBA at the 450 project sites (Reproduced with permission from the Wisconsin Department of Natural Resources) and B) comparison of concentrations in the Western Area (shaded yellow on A) vs. the rest of the state.**

18 out of 19 project samples above the EPA March 2023 proposed MCLs  
(not shown: study well number 27)

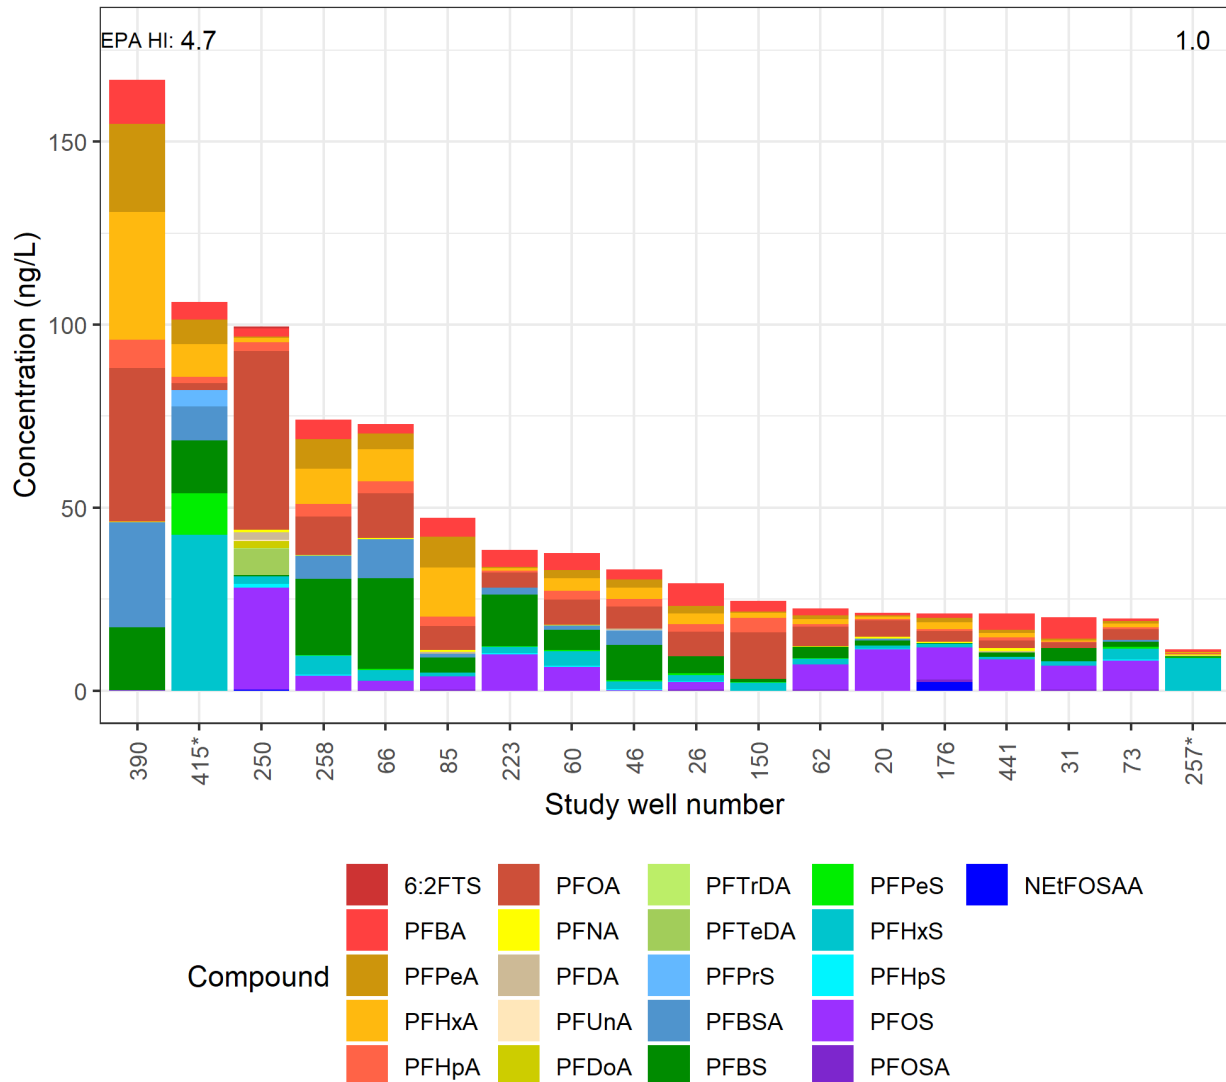

\*Above the EPA March 2023 proposed Hazard Index (HI) only, PFOA and PFOS both less than 4 ng/L

**Figure S10. Stacked column plots of the PFAS detected in 18 of the 19 samples with one or more PFAS above the EPA March 2023 proposed MCLs.**

Figure S10 allows comparison of PFAS signatures (combinations and ratios of compounds detected) in the samples shown. Signatures may be affected by source type as well as transport in soil and groundwater. The sample not shown is the one with PFOA detected at 11,300 ng/L; complete results for all project samples can be found in Table S22.

Tables S20 through S24 are provided in an accompanying Microsoft Excel spreadsheet. The p-values listed in Table S24 were calculated with the R package “psych”, version 2.3.6, using:

```
psych::corr.test(data, use="complete", method = "spearman", adjust="holm", alpha = 0.05).
```

**Table S20. Locations of project wells and number of land application sites within 1000 m**

**Table S21. Field parameter data with laboratory pH and conductivity results**

**Table S22. Sample analytical data for primary samples**

**Table S23. Sample analytical data for field quality control samples (field blanks and duplicates)**

**Table S24. Significance (Holm sequentially adjusted p-values) of the correlations in Figure 4 of the manuscript.**

## References

- (1) Michigan Department of Environmental Quality. *General PFAS Sampling Guidance*; 2018. <https://www.michigan.gov/pfasresponse/-/media/Project/Websites/PFAS-Response/Sampling-Guidance/General.pdf?rev=5fb24f7dabf0468b9415679b60681503> (accessed 2021-03-08).
- (2) U.S. Environmental Protection Agency. *Other Test Method 45 (OTM-45) Measurement of Selected Per- and Polyfluorinated Alkyl Substances from Stationary Sources*. <https://www.epa.gov/emc/emc-other-test-methods> (accessed 2023-02-11).
- (3) U.S. Environmental Protection Agency. *Draft Method 1633: Analysis of Per- and Polyfluoroalkyl Substances (PFAS) in Aqueous, Solid, Biosolids, and Tissue Samples by LC-MS/MS*. [https://www.epa.gov/system/files/documents/2021-09/method\\_1633\\_draft\\_aug-2021.pdf](https://www.epa.gov/system/files/documents/2021-09/method_1633_draft_aug-2021.pdf) (accessed 2023-02-11).
- (4) Barzen-Hanson, K. A.; Field, J. A. Discovery and Implications of C<sub>2</sub> and C<sub>3</sub> Perfluoroalkyl Sulfonates in Aqueous Film-Forming Foams and Groundwater. *Environ. Sci. Technol. Lett.* **2015**, 2 (4), 95–99. <https://doi.org/10.1021/acs.estlett.5b00049>.
- (5) Meng, P.; DeStefano, N. J.; Knappe, D. R. U. Extraction and Matrix Cleanup Method for Analyzing Novel Per- and Polyfluoroalkyl Ether Acids and Other Per- and Polyfluoroalkyl Substances in Fruits and Vegetables. *J. Agric. Food Chem.* **2022**, acs.jafc.1c07665. <https://doi.org/10.1021/acs.jafc.1c07665>.
- (6) U.S. Environmental Protection Agency. Method 533: Determination of Per- and Polyfluoroalkyl Substances in Drinking Water by Isotope Dilution Anion Exchange Solid Phase Extraction and Liquid Chromatography/Tandem Mass Spectrometry, 2019. <https://www.epa.gov/sites/default/files/2019-12/documents/method-533-815b19020.pdf> (accessed 2023-09-30).
- (7) U.S. Environmental Protection Agency. CompTox Chemicals Dashboard. <https://comptox.epa.gov/dashboard/> (accessed 2023-03-19).

- (8) Zimmerman, L. R.; Hostetler, K. A.; Thurman, E. M. *Methods of Analysis by the U.S. Geological Survey Organic Geochemistry Research Group-Determination of Chloroacetanilide Herbicide Metabolites in Water Using High-Performance Liquid Chromatography-Diode Array Detection and High-Performance Liquid Chromatography/Mass Spectrometry*; U.S.G.S. Open-File Report 00–182; 2000. <https://pubs.usgs.gov/of/2000/0182/report.pdf>.
- (9) Bridgewater, L. *Standard Methods for the Examination of Water and Wastewater*, 22nd ed.; American Public Health Association, 2012.
- (10) Wisconsin Department of Natural Resources - GIS Services Section. *Wisland 2 Land Cover User Guide*; Madison, WI, USA, 2016. <https://dnr.wisconsin.gov/maps/WISCLAND> (accessed 2023-03-17).
- (11) Helsel, D. R. *Statistics for Censored Environmental Data Using Minitab and R*, 2nd edition.; Wiley Series in Statistics in Practice; Wiley: Denver, 2012.
- (12) Lee, L. *NADA (version 1.6-1.1) Nondetects and Data Analysis for Environmental Data*. <https://www.rdocumentation.org/packages/NADA/versions/1.6-1.1> (accessed 2023-06-22).
- (13) Pfothner, D.; Sellers, E.; Olson, M.; Praedel, K.; Shafer, M. PFAS Concentrations and Deposition in Precipitation: An Intensive 5-Month Study at National Atmospheric Deposition Program – National Trends Sites (NADP-NTN) across Wisconsin, USA. *Atmospheric Environment* **2022**, *291*, 119368. <https://doi.org/10.1016/j.atmosenv.2022.119368>.
